# Supplementary material for: Electrocatalytic three-component synthesis of 4-halopyrazoles with sodium halide as the halogen source
Source: Royal Society of Chemistry journal article supplement (doi:10.1039/d2ob01612e), 2022-01-01
Supplement: d2ob01612e1.pdf [file d2ob01612e1.pdf]

## Supporting Information

### Electrocatalytic Three-Component Synthesis of 4-Halopyrazoles with Sodium Halide as Halogen Source

Jin-Yang Chen<sup>a,b</sup>, Hong-Xia Li<sup>b</sup>, Si-Yu Mu<sup>b</sup>, Hai-Yang Song<sup>b</sup>, Zhi-Lin Wu<sup>b</sup>,  
Tian-Bao Yang<sup>b</sup>, Jun Jiang<sup>b</sup>, Wei-Min He<sup>b,\*</sup>

<sup>a</sup>Postdoctoral Mobile Station of Basic Medical Sciences, Hengyang Medical School, University of South China, Hengyang 421001, China

<sup>b</sup>School of Chemistry and Chemical Engineering, University of South China, Hengyang 421001, China

### Table of Content

|                                                                    |     |
|--------------------------------------------------------------------|-----|
| 1. General information.....                                        | S2  |
| 2. Experimental Section.....                                       | S3  |
| 3. Characterization data of products.....                          | S7  |
| 4. References.....                                                 | S13 |
| 5. <sup>1</sup> H and <sup>13</sup> C NMR spectra of products..... | S14 |

## 1. General Information

Unless otherwise noted, materials were obtained from commercial suppliers and used without further purification. The instrument for electrolysis is dual display potentiostat (DJS-292B) (made in China). The anode electrode is graphite (15 mm × 10 mm × 2 mm) and cathode electrode is platinum electrode (15 mm × 10 mm × 0.1 mm). The instrument for cyclic voltammetry is CHI 660E potentiostat, and the conditions are as follow: a glassy carbon disk working electrode (diameter, 3 mm), Pt disk and Ag/AgCl (0.1 M in CH<sub>3</sub>CN) as counter and reference electrode. Thin layer chromatography (TLC) employed glass 0.25 mm silica gel plates. Flash chromatography columns were packed with 200-300 mesh silica gel. <sup>1</sup>H NMR spectra were recorded at 500 MHz, <sup>13</sup>C NMR spectra were recorded at 125 MHz and <sup>19</sup>F NMR spectra were recorded at 471 MHz by using a Bruker Avance 500 spectrometer. Chemical shifts were calibrated using residual undeuterated solvent as an internal reference (<sup>1</sup>H NMR: CDCl<sub>3</sub> 7.26 ppm, <sup>13</sup>C NMR: CDCl<sub>3</sub> 77.0 ppm), the chemical shifts (δ) were expressed in ppm and J values were given in Hz. HRMS were performed on a spectrometer operating on ESI-TOF.

## 2. Experimental Section

Table S1. Optimization of the reaction conditions

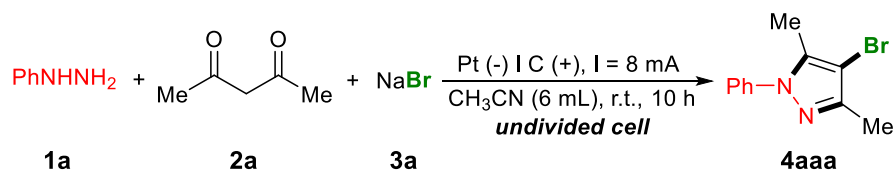

| Entry | Variation from the standard reaction conditions | Yield <sup>b</sup> |
|-------|-------------------------------------------------|--------------------|
| 1     | None                                            | 96%                |
| 2     | C(+) C(-) instead of C(+) Pt (-)                | 76%                |
| 3     | C(+) Cu(-) instead of C(+) Pt (-)               | 80%                |
| 4     | C(+) Ni(-) instead of C(+) Pt (-)               | 31%                |
| 5     | Pt(+) Pt(-) instead of C(+) Pt (-)              | 89%                |
| 6     | Pt(+) Mg(-) instead of C(+) Pt (-)              | 79%                |
| 7     | Pt(+) Fe(-) instead of C(+) Pt (-)              | 72%                |
| 8     | Pt(+) Zn (-) instead of C(+) Pt (-)             | 86%                |
| 9     | NH <sub>4</sub> Br instead of NaBr              | 90%                |
| 10    | TBAB instead of NaBr                            | 73%                |
| 11    | NBS instead of NaBr                             | 76%                |
| 12    | MgBr <sub>2</sub> instead of NaBr               | 44%                |
| 13    | CsBr instead of NaBr                            | 51%                |
| 14    | EtOH instead of MeCN                            | 79%                |
| 15    | DMF instead of MeCN                             | 23%                |
| 16    | DMSO instead of MeCN                            | 36%                |
| 17    | DCE instead of MeCN                             | trace              |
| 18    | THF instead of MeCN                             | trace              |
| 19    | 1.0 equiv. of NaBr                              | 84%                |
| 20    | 4 mL MeCN instead of 6 mL                       | 93%                |
| 21    | 5 mA, 10 h instead of 8 mA, 10 h                | 56%                |
| 22    | 15 mA, 4 h instead of 8 mA, 10 h                | 78%                |
| 23    | Without electric current                        | N.D. <sup>c</sup>  |

<sup>a</sup>Conditions: C (15 mm × 10 mm × 2 mm) as the anode, Pt (15 mm × 10 mm × 0.1 mm) as the cathode, constant current = 8 mA, **1a** (0.5 mmol), **2a** (0.5 mmol), **3** (1 mmol), MeCN (6 mL), room temperature, in air, 10 h, undivided cell; <sup>b</sup>GC yields using dodecane as an internal reference. <sup>c</sup>No desired product.

## Scheme S1 Control Experiments

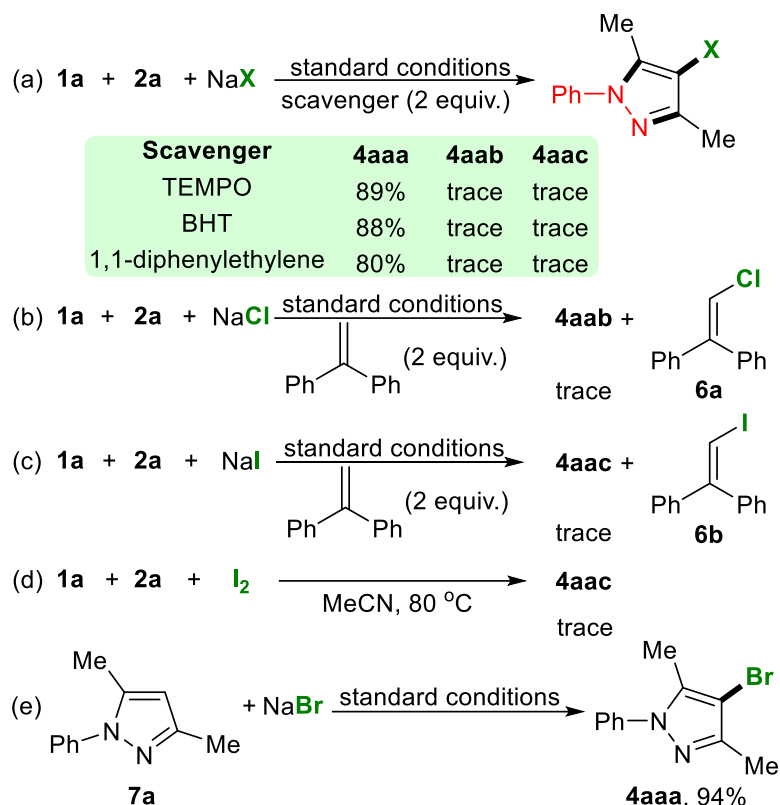

## 2.1 General experimental procedure A for Compounds 4aaa-4aca

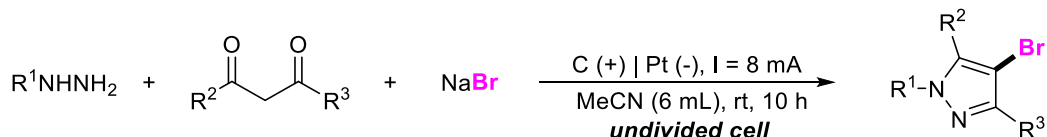

In an undivided three-necked flask (25 mL) equipped with a stir bar, hydrazine (0.5 mmol), diacetone (0.5 mmol), NaBr (1.0 mmol) and MeCN (6 mL) were added. The flask was equipped with platinum electrode (15 mm × 10 mm × 0.1 mm) as cathode, graphite (15 mm × 10 mm × 2 mm) as the anode. The reaction mixture was stirred and electrolyzed at a constant current of 8 mA under room temperature for 10 h. After completion, the solvent was concentrated under reduced pressure, and the pure products **4aaa-4aca** were obtained by flash chromatography on silica gel.

## 2.2 General experimental procedure B for Compounds 4aab-4bab

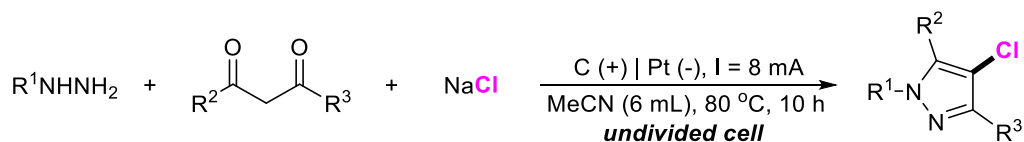

In an undivided three-necked flask (25 mL) equipped with a stir bar, hydrazine (0.5 mmol), diacetone (0.5 mmol), NaCl (1.0 mmol) and MeCN (6 mL) were added. The flask was equipped with platinum electrode (15 mm × 10 mm × 0.1 mm) as cathode, graphite (15 mm × 10 mm × 2 mm) as the anode. The reaction mixture was stirred and electrolyzed at a constant current of 8 mA

under 80 °C for 10 h. After completion, the solvent was concentrated under reduced pressure, and the pure products **4aab-4bab** were obtained by flash chromatography on silica gel.

### 2.3 General experimental procedure C for Compound **4aac**

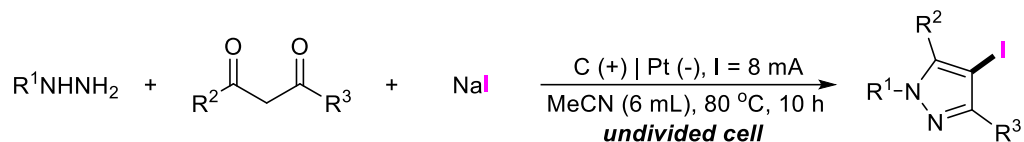

In an undivided three-necked flask (25 mL) equipped with a stir bar, hydrazine (0.5 mmol), diacetone (0.5 mmol), NaI (2.0 mmol) and MeCN (6 mL) were added. The flask was equipped with platinum electrode (15 mm × 10 mm × 0.1 mm) as cathode, graphite (15 mm × 10 mm × 2 mm) as the anode. The reaction mixture was stirred and electrolyzed at a constant current of 8 mA under 80 °C for 10 h. After completion, the solvent was concentrated under reduced pressure, and the pure product **4aac** was obtained by flash chromatography on silica gel.

### 2.4 General experimental procedure D for Compounds **5aa-6da**

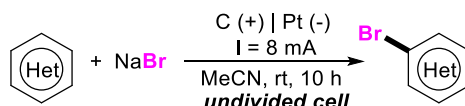

In an undivided three-necked flask (25 mL) equipped with a stir bar, aromatic heterocycles (0.5 mmol), NaBr (1.0 mmol) and MeCN (6 mL) were added. The flask was equipped with platinum electrode (15 mm × 10 mm × 0.1 mm) as cathode, graphite (15 mm × 10 mm × 2 mm) as the anode. The reaction mixture was stirred and electrolyzed at a constant current of 8 mA for 10 h. After completion, the solvent was concentrated under reduced pressure, and the pure products **5aa-6da** were obtained by flash chromatography on silica gel.

### 2.5 Large-scale synthesis of **4aaa**

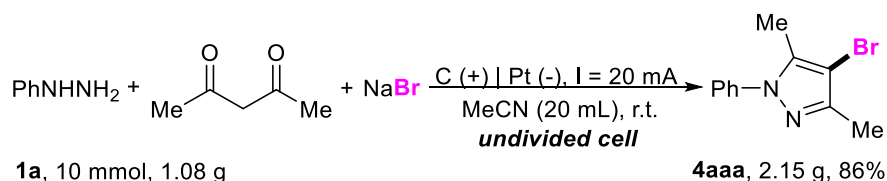

In an undivided three-necked flask (25 mL) equipped with a stir bar, hydrazine (10 mmol), diacetone (10 mmol), NaBr (20 mmol) and MeCN (20 mL) were added. The flask was equipped with platinum electrode (15 mm × 10 mm × 0.1 mm) as cathode, graphite (15 mm × 10 mm × 2 mm) as the anode. The reaction mixture was stirred and electrolyzed at a constant current of 20 mA under room temperature for 72 h. After completion, the solvent was concentrated under reduced pressure, and the pure product **4aaa** was obtained by flash chromatography on silica gel in the yield of 86%.

## 2.6 Cyclic voltammetry experiment:

CV measurements were performed on a CHI 660E potentiostat, and the conditions are as follow: a glassy carbon disk working electrode (diameter, 3 mm), Pt disk and Ag/AgCl (0.1 M in CH<sub>3</sub>CN) as counter and reference electrode. Cyclic voltammograms of reactants and their mixtures in 0.1 M Bu<sub>4</sub>NBF<sub>4</sub>/CH<sub>3</sub>CN using a glassy carbon disk working electrode (diameter, 3 mm), Pt disk and Ag/AgCl (0.1 M in CH<sub>3</sub>CN) as counter and reference electrode at 50 mV/s scan rate: a) NaBr (20 mmol/L), b) NaCl (20 mmol/L), MeCN (9.5 mL), H<sub>2</sub>O (0.5 mL), c) NaI (20 mmol/L), d) **7a** (20 mmol/L).

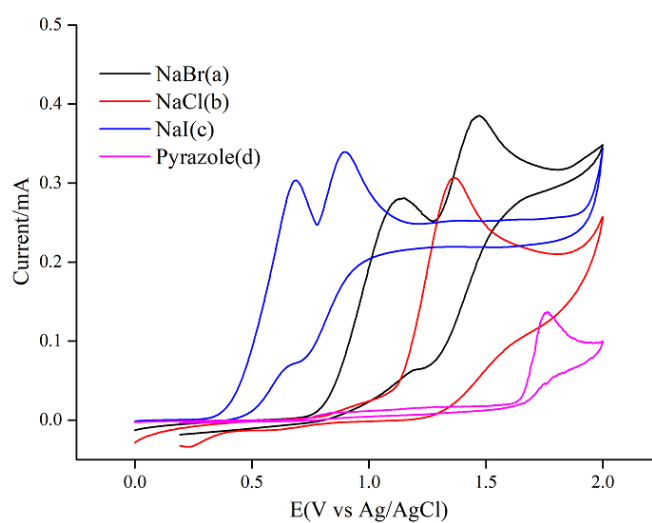

Figure S1 Cyclic voltammetry experiment

### 3. Characterization data of products 4aaa-4iab and 5aa-6da

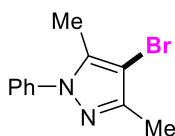

**4-bromo-3,5-dimethyl-1-phenyl-1H-pyrazole (4aaa)**<sup>[1]</sup>: <sup>1</sup>H NMR (500 MHz, CDCl<sub>3</sub>) δ 7.37 (d, *J* = 7.5 Hz, 2H), 7.31 (d, *J* = 8.5 Hz, 3H), 2.22 (s, 6H); <sup>13</sup>C NMR (125 MHz, CDCl<sub>3</sub>) δ 146.50, 138.72, 136.45, 128.13, 126.77, 123.60, 95.33, 11.34, 10.73.

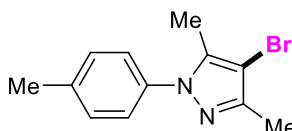

**4-bromo-3,5-dimethyl-1-(p-tolyl)-1H-pyrazole (4baa)**: <sup>1</sup>H NMR (500 MHz, CDCl<sub>3</sub>) δ 7.27-7.23 (m, 4H), 2.39 (s, 3H), 2.29 (s, 3H), 2.27 (s, 3H); <sup>13</sup>C NMR (125 MHz, CDCl<sub>3</sub>) δ 147.27, 137.80, 137.47, 137.39, 129.72, 124.59, 96.03, 21.13, 12.38, 11.69; HRMS: calcd for C<sub>12</sub>H<sub>14</sub>BrN<sub>2</sub> [M+H]<sup>+</sup> 265.0340, found 265.0344.

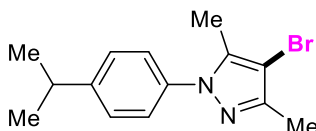

**4-bromo-1-(4-isopropylphenyl)-3,5-dimethyl-1H-pyrazole (4caa)**: <sup>13</sup>C NMR (500 MHz, CDCl<sub>3</sub>) δ 7.30 (s, 4H), 2.97-2.94 (m, 1H), 2.29 (s, 6H), 1.27 (s, 3H), 1.26 (s, 3H); <sup>13</sup>C NMR (125 MHz, CDCl<sub>3</sub>) δ 148.74, 147.26, 137.59, 137.45, 127.14, 124.66, 95.98, 33.84, 23.97, 12.38, 11.70; HRMS: calcd for C<sub>14</sub>H<sub>18</sub>BrN<sub>2</sub> [M+H]<sup>+</sup> 293.0653, found 293.0651.

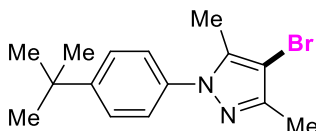

**4-bromo-1-(4-(tert-butyl)phenyl)-3,5-dimethyl-1H-pyrazole (4daa)**: <sup>1</sup>H NMR (500 MHz, CDCl<sub>3</sub>) δ 7.45 (d, *J* = 8.5 Hz, 2H), 7.30 (d, *J* = 8.5 Hz, 2H), 2.29 (s, 6H), 1.34 (s, 9H); <sup>13</sup>C NMR (500 MHz, CDCl<sub>3</sub>) δ 150.94, 147.25, 137.41, 137.29, 126.07, 124.27, 96.03, 34.69, 31.34, 12.40, 11.72; HRMS: calcd for C<sub>15</sub>H<sub>20</sub>BrN<sub>2</sub> [M+H]<sup>+</sup> 307.0810, found 307.0813.

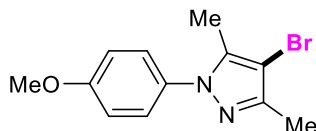

**4-bromo-1-(4-methoxyphenyl)-3,5-dimethyl-1H-pyrazole (4eaa)**<sup>[2]</sup>: <sup>1</sup>H NMR (500 MHz, CDCl<sub>3</sub>) δ 7.29 (d, *J* = 8.5 Hz, 2H), 6.96 (d, *J* = 8.5 Hz, 2H), 3.84 (s, 3H), 2.28 (s, 3H), 2.24 (s, 3H); <sup>13</sup>C NMR (125 MHz, CDCl<sub>3</sub>) δ 159.18, 147.12, 137.66, 132.95, 126.31, 114.28, 95.65, 55.57, 12.34, 11.53.

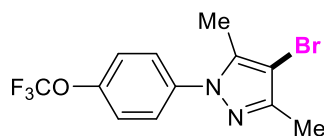

**4-bromo-3,5-dimethyl-1-(4-(trifluoromethoxy)phenyl)-1H-pyrazole (4faa):**  $^1\text{H}$  NMR (500 MHz,  $\text{CDCl}_3$ )  $\delta$  7.45 (d,  $J = 8.5$  Hz, 2H), 7.31 (d,  $J = 8.5$  Hz, 2H), 2.32 (s, 3H), 2.29 (s, 3H);  $^{13}\text{C}$  NMR (125 MHz,  $\text{CDCl}_3$ )  $\delta$  148.26, 148.10, 138.28, 137.56, 125.88, 121.73, 120.42 (q,  $J_{\text{C-F}} = 258.3$  Hz), 96.93, 12.31, 11.74;  $^{19}\text{F}$  NMR (471 MHz,  $\text{CDCl}_3$ )  $\delta$  -58.02; HRMS: calcd for  $\text{C}_{12}\text{H}_{11}\text{BrF}_3\text{N}_2\text{O}$   $[\text{M}+\text{H}]^+$  335.0007, found 335.0004.

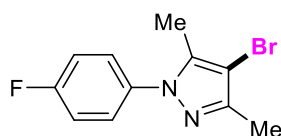

**4-bromo-1-(4-fluorophenyl)-3,5-dimethyl-1H-pyrazole (4gaa):**  $^1\text{H}$  NMR (500 MHz,  $\text{CDCl}_3$ )  $\delta$  7.38-7.36 (m, 2H), 7.17-7.14 (m, 2H), 2.29 (s, 3H), 2.28 (s, 3H);  $^{13}\text{C}$  NMR (125 MHz,  $\text{CDCl}_3$ )  $\delta$  161.91 (d,  $J_{\text{C-F}} = 248.5$  Hz, 2H), 147.70, 137.64, 135.96, 126.64 (d,  $J_{\text{C-F}} = 1.1$  Hz), 116.21 (d,  $J_{\text{C-F}} = 23.1$  Hz), 96.37, 12.36, 11.65;  $^{19}\text{F}$  NMR (471 MHz,  $\text{CDCl}_3$ )  $\delta$  -113.39; HRMS: calcd for  $\text{C}_{11}\text{H}_{11}\text{BrFN}_2$   $[\text{M}+\text{H}]^+$  269.0090, found 269.0088.

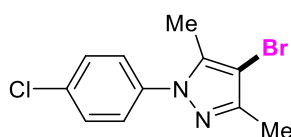

**4-bromo-1-(4-chlorophenyl)-3,5-dimethyl-1H-pyrazole (4haa)** <sup>[3]</sup>:  $^1\text{H}$  NMR (500 MHz,  $\text{CDCl}_3$ )  $\delta$  7.48-7.45 (m, 2H), 7.41-7.36 (m, 2H), 2.30 (s, 3H), 2.31 (s, 3H);  $^{13}\text{C}$  NMR (125 MHz,  $\text{CDCl}_3$ )  $\delta$  147.58, 139.82, 137.52, 129.19, 127.83, 124.69, 96.38, 12.39, 11.78.

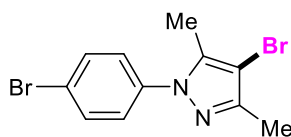

**4-bromo-1-(4-bromophenyl)-3,5-dimethyl-1H-pyrazole (4iaa):**  $^1\text{H}$  NMR (500 MHz,  $\text{CDCl}_3$ )  $\delta$  7.58 (d,  $J = 8.5$  Hz, 2H), 7.29 (d,  $J = 8.5$  Hz, 2H), 2.30 (s, 3H), 2.29 (s, 3H);  $^{13}\text{C}$  NMR (125 MHz,  $\text{CDCl}_3$ )  $\delta$  148.05, 138.83, 137.47, 132.32, 125.96, 121.40, 96.96, 12.40, 11.86; HRMS: calcd for  $\text{C}_{11}\text{H}_{11}\text{Br}_2\text{N}_2$   $[\text{M}+\text{H}]^+$  328.9289, found 328.9291.

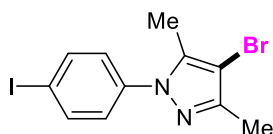

**4-bromo-1-(4-iodophenyl)-3,5-dimethyl-1H-pyrazole (4jaa):**  $^1\text{H}$  NMR (500 MHz,  $\text{CDCl}_3$ )  $\delta$  7.78 (d,  $J = 8.0$  Hz, 2H), 7.16 (d,  $J = 8.0$  Hz, 2H), 2.31 (s, 3H), 2.29 (s, 3H);  $^{13}\text{C}$  NMR (125 MHz,



CDCl<sub>3</sub>)  $\delta$  148.11, 139.52, 138.30, 137.45, 126.14, 97.02, 92.63, 12.40, 11.88; HRMS: calcd for C<sub>11</sub>H<sub>11</sub>BrIN<sub>2</sub> [M+H]<sup>+</sup> 376.9150, found 376.9142.

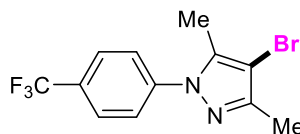

**4-bromo-3,5-dimethyl-1-(4-(trifluoromethyl)phenyl)-1H-pyrazole (4kaa):** <sup>1</sup>H NMR (500 MHz, CDCl<sub>3</sub>)  $\delta$  7.73 (d,  $J$  = 8.5 Hz, 2H), 7.56 (d,  $J$  = 8.5 Hz, 2H), 2.36 (s, 3H), 2.30 (s, 3H); <sup>13</sup>C NMR (125 MHz, CDCl<sub>3</sub>)  $\delta$  148.62, 142.56, 137.58, 129.44 (d,  $J_{C-F}$  = 33.0 Hz), 126.41 (d,  $J_{C-F}$  = 3.8 Hz), 124.17, 123.80 (d,  $J_{C-F}$  = 274.8 Hz), 97.75, 12.38, 12.05; <sup>19</sup>F NMR (471 MHz, CDCl<sub>3</sub>)  $\delta$  -62.46; HRMS: calcd for C<sub>12</sub>H<sub>11</sub>BrF<sub>3</sub>N<sub>2</sub> [M+H]<sup>+</sup> 319.0058, found 319.0064.

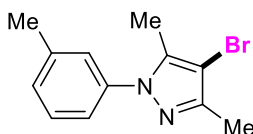

**4-bromo-3,5-dimethyl-1-(m-tolyl)-1H-pyrazole (4laa):** <sup>1</sup>H NMR (500 MHz, CDCl<sub>3</sub>)  $\delta$  7.32 (t,  $J$  = 8.0 Hz, 1H), 7.24 (s, 1H), 7.17 (t,  $J$  = 8.0 Hz, 2H), 2.40 (s, 3H), 2.29 (s, 6H); <sup>13</sup>C NMR (125 MHz, CDCl<sub>3</sub>)  $\delta$  147.39, 139.73, 139.38, 137.47, 128.86, 128.61, 125.41, 121.63, 96.22, 21.37, 12.39, 11.77; HRMS: calcd for C<sub>12</sub>H<sub>14</sub>BrN<sub>2</sub> [M+H]<sup>+</sup> 265.0340, found 265.0344.

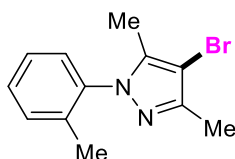

**4-bromo-3,5-dimethyl-1-(o-tolyl)-1H-pyrazole (4maa):** <sup>1</sup>H NMR (500 MHz, CDCl<sub>3</sub>)  $\delta$  7.36-7.30 (m, 2H), 7.27 (t,  $J$  = 7.5 Hz, 1H), 7.18 (d,  $J$  = 7.5 Hz, 1H), 2.29 (s, 3H), 2.07 (s, 3H), 2.06 (s, 3H); <sup>13</sup>C NMR (125 MHz, CDCl<sub>3</sub>)  $\delta$  147.07, 138.61, 138.44, 136.08, 131.01, 129.38, 127.79, 126.64, 94.54, 17.26, 12.43, 10.72; HRMS: calcd for C<sub>12</sub>H<sub>14</sub>BrN<sub>2</sub> [M+H]<sup>+</sup> 265.0340, found 265.0344.

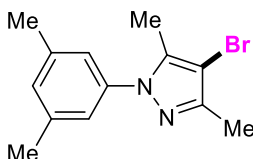

**4-bromo-1-(3,5-dimethylphenyl)-3,5-dimethyl-1H-pyrazole (4naa):** <sup>1</sup>H NMR (500 MHz, CDCl<sub>3</sub>)  $\delta$  7.00 (s, 3H), 2.35 (s, 6H), 2.29 (s, 6H); <sup>13</sup>C NMR (125 MHz, CDCl<sub>3</sub>)  $\delta$  147.22, 139.67, 138.98, 137.43, 129.52, 122.45, 96.03, 21.27, 12.38, 11.76; HRMS: calcd for C<sub>13</sub>H<sub>16</sub>BrN<sub>2</sub> [M+H]<sup>+</sup> 279.0473, found 279.0478.

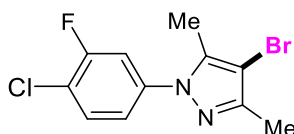

**4-bromo-1-(3-chloro-4-fluorophenyl)-3,5-dimethyl-1H-pyrazole (4oaa):**  $^1\text{H}$  NMR (500 MHz,  $\text{CDCl}_3$ )  $\delta$  7.51 (d,  $J = 6.5$  Hz, 1H), 7.28 (t,  $J = 8.5$  Hz, 1H), 7.23 (t,  $J = 8.5$  Hz, 1H), 2.30 (s, 3H), 2.28 (s, 3H);  $^{13}\text{C}$  NMR (125 MHz,  $\text{CDCl}_3$ )  $\delta$  157.38 (d,  $J_{\text{C-F}} = 251.0$  Hz), 148.23, 137.66, 136.36 (d,  $J_{\text{C-F}} = 0.4$  Hz), 127.04, 124.22 (d,  $J_{\text{C-F}} = 7.4$  Hz), 121.77 (d,  $J_{\text{C-F}} = 19.0$  Hz), 116.92 (d,  $J_{\text{C-F}} = 22.7$  Hz), 97.01, 12.35, 11.75;  $^{19}\text{F}$  NMR (471 MHz,  $\text{CDCl}_3$ )  $\delta$  -115.76-115.80 (m, 1F); HRMS: calcd for  $\text{C}_{11}\text{H}_{10}\text{BrClFN}_2$   $[\text{M}+\text{H}]^+$  302.9700, found 302.9767.

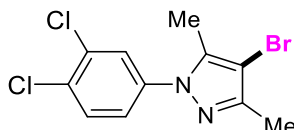

**4-bromo-1-(3,4-dichlorophenyl)-3,5-dimethyl-1H-pyrazole (4paa):**  $^1\text{H}$  NMR (500 MHz,  $\text{CDCl}_3$ )  $\delta$  7.58 (s, 1H), 7.53 (d,  $J = 8.5$  Hz, 1H), 7.27 (d,  $J = 5.5$  Hz, 1H), 2.33 (s, 3H), 2.29 (s, 3H);  $^{13}\text{C}$  NMR (125 MHz,  $\text{CDCl}_3$ )  $\delta$  148.52, 139.01, 137.59, 133.25, 131.76, 130.76, 126.20, 123.30, 97.48, 12.38, 11.94; HRMS: calcd for  $\text{C}_{11}\text{H}_{10}\text{BrCl}_2\text{N}_2$   $[\text{M}+\text{H}]^+$  318.9404, found 318.9401.

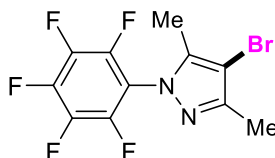

**4-bromo-3,5-dimethyl-1-(perfluorophenyl)-1H-pyrazole (4qaa):**  $^1\text{H}$  NMR (500 MHz,  $\text{CDCl}_3$ )  $\delta$  2.30 (s, 3H), 2.17 (s, 3H);  $^{13}\text{C}$  NMR (125 MHz,  $\text{CDCl}_3$ )  $\delta$  150.52, 145.0-144.9 (m), 143.08-142.87 (m), 140.29, 139.03-138.77 (m), 136.99-136.79 (m), 96.86, 12.55, 10.37;  $^{19}\text{F}$  NMR (471 MHz,  $\text{CDCl}_3$ )  $\delta$  -145.05--145.09 (m), -151.1--151.20 (m), -160.4--160.52 (m); HRMS: calcd for  $\text{C}_{11}\text{H}_7\text{BrF}_5\text{N}_2$   $[\text{M}+\text{H}]^+$  340.9713, found 340.9710.

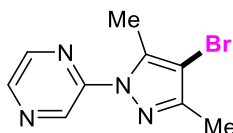

**2-(4-bromo-3,5-dimethyl-1H-pyrazol-1-yl)pyrazine (4raa):**  $^1\text{H}$  NMR (500 MHz,  $\text{CDCl}_3$ )  $\delta$  9.23 (s, 1H), 8.45 (s, 1H), 8.35 (s, 1H), 2.66 (s, 3H), 2.33 (s, 3H);  $^{13}\text{C}$  NMR (125 MHz,  $\text{CDCl}_3$ )  $\delta$  149.76, 149.41, 141.19, 141.11, 139.77, 138.01, 99.92, 13.55, 12.61; HRMS: calcd for  $\text{C}_9\text{H}_{10}\text{BrN}_4$   $[\text{M}+\text{H}]^+$  253.0089, found 253.0092.

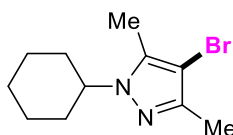

**4-bromo-1-cyclohexyl-3,5-dimethyl-1H-pyrazole (4saa):**  $^1\text{H}$  NMR (500 MHz,  $\text{CDCl}_3$ )  $\delta$  3.90 (t,  $J = 10.5$  Hz, 1H), 2.23 (s, 3H), 2.21 (s, 3H), 1.92-1.86 (m, 6H), 1.69 (t,  $J = 7.0$  Hz, 1H), 1.38-1.25 (m, 3H);  $^{13}\text{C}$  NMR (125 MHz,  $\text{CDCl}_3$ )  $\delta$  145.30, 135.83, 93.59, 58.46, 32.65, 25.75, 25.15, 12.38, 10.26; HRMS: calcd for  $\text{C}_{11}\text{H}_{18}\text{BrN}_2$   $[\text{M}+\text{H}]^+$  257.0653, found 257.0658.

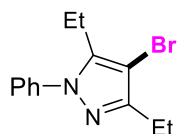

**4-bromo-3,5-diethyl-1-phenyl-1H-pyrazole (4aba):**  $^1\text{H}$  NMR (500 MHz,  $\text{CDCl}_3$ )  $\delta$  7.43-7.38 (m, 3H), 7.33-7.32 (m, 2H), 2.64-2.60 (m, 4H), 1.22 (t,  $J = 7.5$  Hz, 3H), 1.04 (t,  $J = 7.5$  Hz, 3H);  $^{13}\text{C}$  NMR (125 MHz,  $\text{CDCl}_3$ )  $\delta$  151.42, 141.91, 138.90, 128.17, 127.08, 124.27, 93.32, 19.39, 17.64, 11.98, 11.88; HRMS: calcd for  $\text{C}_{13}\text{H}_{16}\text{BrN}_2$   $[\text{M}+\text{H}]^+$  279.0497, found 279.0495.

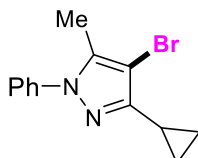

**4-bromo-3-cyclopropyl-5-methyl-1-phenyl-1H-pyrazole (4aca):**  $^1\text{H}$  NMR (500 MHz,  $\text{CDCl}_3$ )  $\delta$  7.50 (d,  $J = 8.0$  Hz, 2H), 7.44 (t,  $J = 8.0$  Hz, 2H), 7.35 (t,  $J = 8.0$  Hz, 1H), 2.28 (s, 3H), 1.80-1.74 (m, 1H), 0.87 (d,  $J = 8.0$  Hz, 2H), 0.71 (d,  $J = 7.5$  Hz, 2H);  $^{13}\text{C}$  NMR (125 MHz,  $\text{CDCl}_3$ )  $\delta$  147.76, 140.71, 139.94, 128.87, 127.52, 124.69, 96.62, 12.37, 6.98, 6.93; HRMS: calcd for  $\text{C}_{13}\text{H}_{14}\text{BrN}_2$   $[\text{M}+\text{H}]^+$  277.0340, found 277.0346.

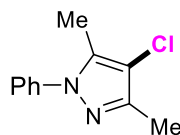

**4-chloro-3,5-dimethyl-1-phenyl-1H-pyrazole (4aab)**<sup>[2]</sup>:  $^1\text{H}$  NMR (500 MHz,  $\text{CDCl}_3$ )  $\delta$  7.48-7.45 (m, 2H), 7.41-7.37 (m, 3H), 2.30 (s, 6H);  $^{13}\text{C}$  NMR (125 MHz,  $\text{CDCl}_3$ )  $\delta$  146.07, 139.75, 135.73, 129.20, 127.75, 124.56, 109.82, 11.44, 10.86.

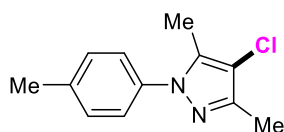

**4-chloro-3,5-dimethyl-1-(p-tolyl)-1H-pyrazole (4bab):**  $^1\text{H}$  NMR (500 MHz,  $\text{CDCl}_3$ )  $\delta$  7.27-7.26 (m, 4H), 2.40 (s, 3H), 2.29 (s, 3H), 2.27 (s, 3H);  $^{13}\text{C}$  NMR (125 MHz,  $\text{CDCl}_3$ )  $\delta$  145.77, 137.74, 137.30, 135.71, 129.73, 124.50, 109.47, 21.13, 11.43, 10.78; HRMS: calcd for  $\text{C}_{12}\text{H}_{14}\text{ClN}_2$   $[\text{M}+\text{H}]^+$  221.0846, found 221.0849.

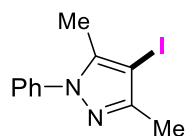

**3-cyclopropyl-5-methyl-1-phenyl-4-thiocyanato-1H-pyrazole (4aac)**<sup>[1]</sup>:  $^1\text{H}$  NMR (500 MHz,  $\text{CDCl}_3$ )  $\delta$  7.45 (t,  $J = 7.5$  Hz, 2H), 7.39-7.35 (m, 3H), 2.33 (s, 3H), 2.31 (s, 3H);  $^{13}\text{C}$  NMR (125 MHz,  $\text{CDCl}_3$ )  $\delta$  150.76, 140.89, 139.89, 129.18, 127.92, 124.80, 65.41, 14.18, 13.51.

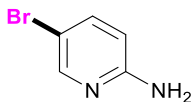

**5-bromopyridin-2-amine (5aa)**<sup>[4]</sup>: <sup>1</sup>H NMR (500 MHz, CDCl<sub>3</sub>) δ 7.42 (d, *J* = 2.5 Hz, 1 H), 7.36 (dd, *J*<sub>1</sub> = 7.5 Hz, *J*<sub>2</sub> = 2.5 Hz, 1H), 6.50 (d, *J* = 7.5 Hz, 1H), 3.53 (s, 3H); <sup>13</sup>C NMR (126 MHz, CDCl<sub>3</sub>) δ 157.05, 148.71, 140.14, 110.07, 108.31.

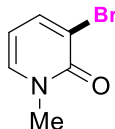

**3-bromo-1-methylpyridin-2(1H)-one (5ba)**<sup>[5]</sup>: <sup>1</sup>H NMR (500 MHz, CDCl<sub>3</sub>) δ 8.10 (s, 1H), 7.49 (d, *J* = 8.5 Hz, 1 H), 6.41 (d, *J* = 8.5 Hz, 1H), 4.53 (s, 2H); <sup>13</sup>C NMR (126 MHz, CDCl<sub>3</sub>) δ 161.53, 142.58, 138.14, 121.90, 97.67, 37.74.

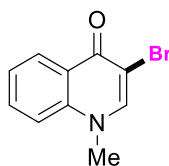

**3-bromo-1-methylquinolin-4(1H)-one (5ca)**<sup>[6]</sup>: <sup>1</sup>H NMR (500 MHz, CDCl<sub>3</sub>) δ 8.55 (d, *J* = 2.0 Hz, 1H), 7.93 (s, 1H), 7.76 (dd, *J*<sub>1</sub> = 7.0 Hz, *J*<sub>2</sub> = 2.0 Hz, 1H), 7.28 (d, *J* = 7.0 Hz, 1H), 3.83 (s, 3H); <sup>13</sup>C NMR (126 MHz, CDCl<sub>3</sub>) δ 171.44, 143.92, 138.58, 135.40, 129.93, 126.48, 118.35, 117.34, 105.47, 40.92.

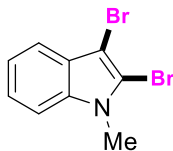

**2,3-dibromo-1-methyl-1H-indene (5da)**<sup>[7]</sup>: <sup>1</sup>H NMR (500 MHz, CDCl<sub>3</sub>) δ 7.50 (d, *J* = 8.0 Hz, 1H), 7.28-7.23 (m, 2H), 7.17 (t, *J* = 8.0 Hz, 1H), 3.78 (s, 3H); <sup>13</sup>C NMR (126 MHz, CDCl<sub>3</sub>) δ 136.34, 126.96, 122.90, 120.80, 118.87, 114.90, 109.62, 92.68, 32.36.

#### 4. References

- [1] Bondarenko, O. B.; Karetnikov, G. L.; Komarov, A. I.; Pavlov, A. I.; Nikolaeva, S. N. *Journal of Organic Chemistry*, **2021**, *86*, 322.
- [2] Zhao, Z.-G.; Wang, Z.-X. *Synthetic Communications*, **2007**, *37*, 137.
- [3] Alinezhad, H.; Tajbakhsh, M.; Zare, M. *Journal of the Mexican Chemical Society*, *2011*, *55*, 238.
- [4] Hanthorn, Jason J.; Valgimigli, Luca; Pratt, Derek A. *Journal of Organic Chemistry*, **2012**, *77*, 6908-6916.
- [5] Schwertz, G.; Witschel, M. C.; Rottmann, M.; Bonnert, R.; Leartsakulpanich, U.; Chitnumsub, P.; Jaruwat, A.; Ittarat, W.; Schafer, A.; Aponte, R. A.; Charman, S. A.; White, K. L.; Kundu, A.; Sadhukhan, S.; Lloyd, M.; Freiberg, G. M.; Srikumaran, M.; Siggel, M.; Zwysig, A.; Chaiyen, P.; Diederich, F. *Journal of Medicinal Chemistry*, **2017**, *60*, 4840-4860.
- [6] Audisio, D.; Messaoudi, S.; Peyrat, J.-F.; Brion, J.-D.; Alami, M. *Journal of Organic Chemistry*, **2011**, *7*, 4995-5005.
- [7] Chelucci, G.; Pinna, G. A.; Pinna, G. *European Journal of Organic Chemistry*, **2014**, (18), 3802-3807.

## 5. $^1\text{H}$ and $^{13}\text{C}$ NMR spectra of products

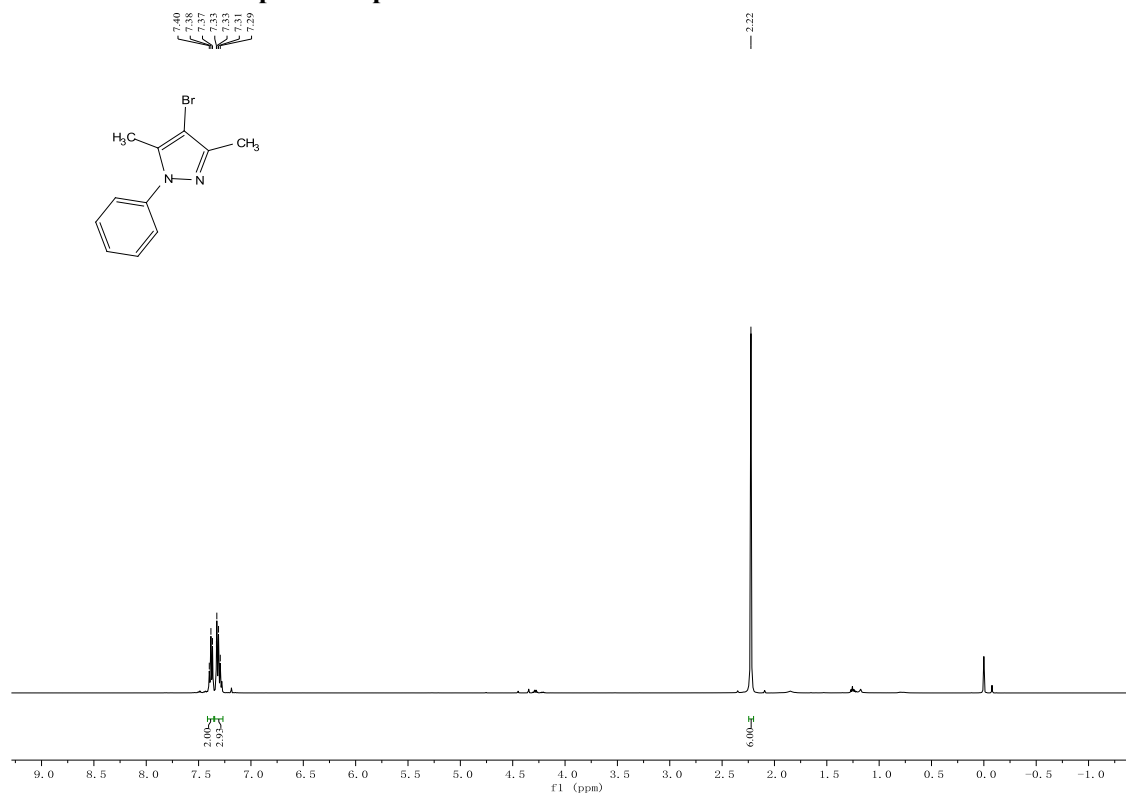

### $^1\text{H}$ NMR of compound **4aaa**

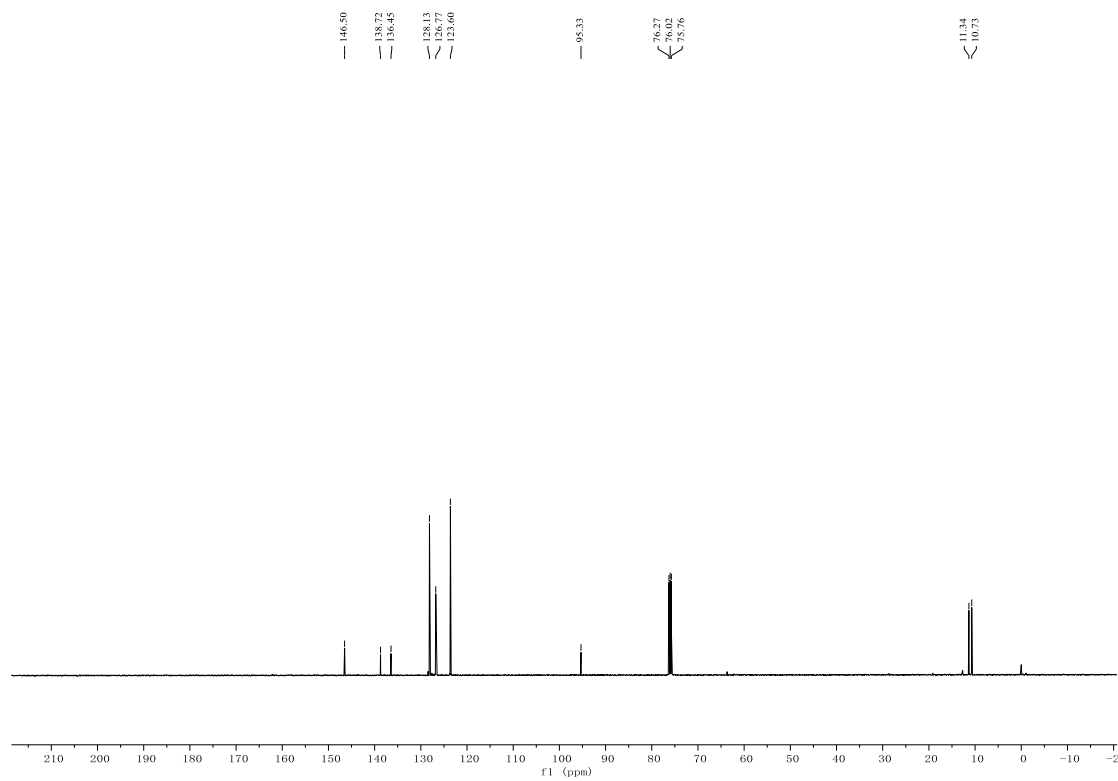

### $^{13}\text{C}$ NMR of compound **4aaa**

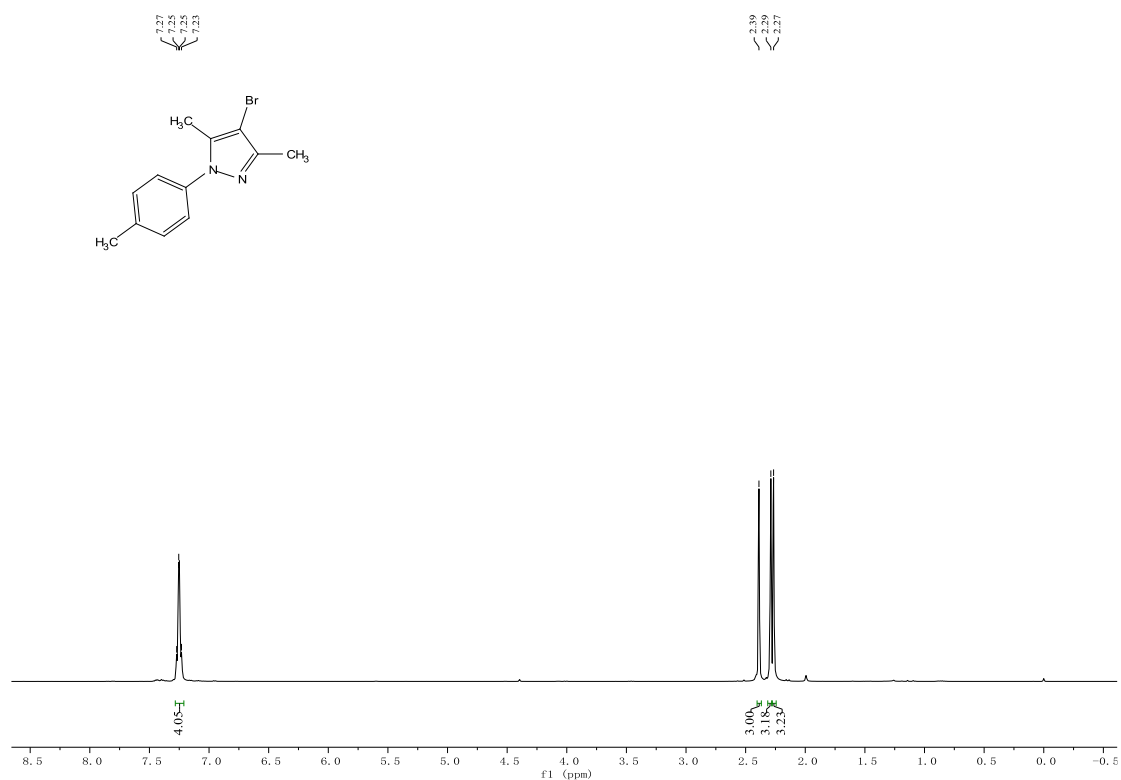

<sup>1</sup>H NMR of compound **4baa**

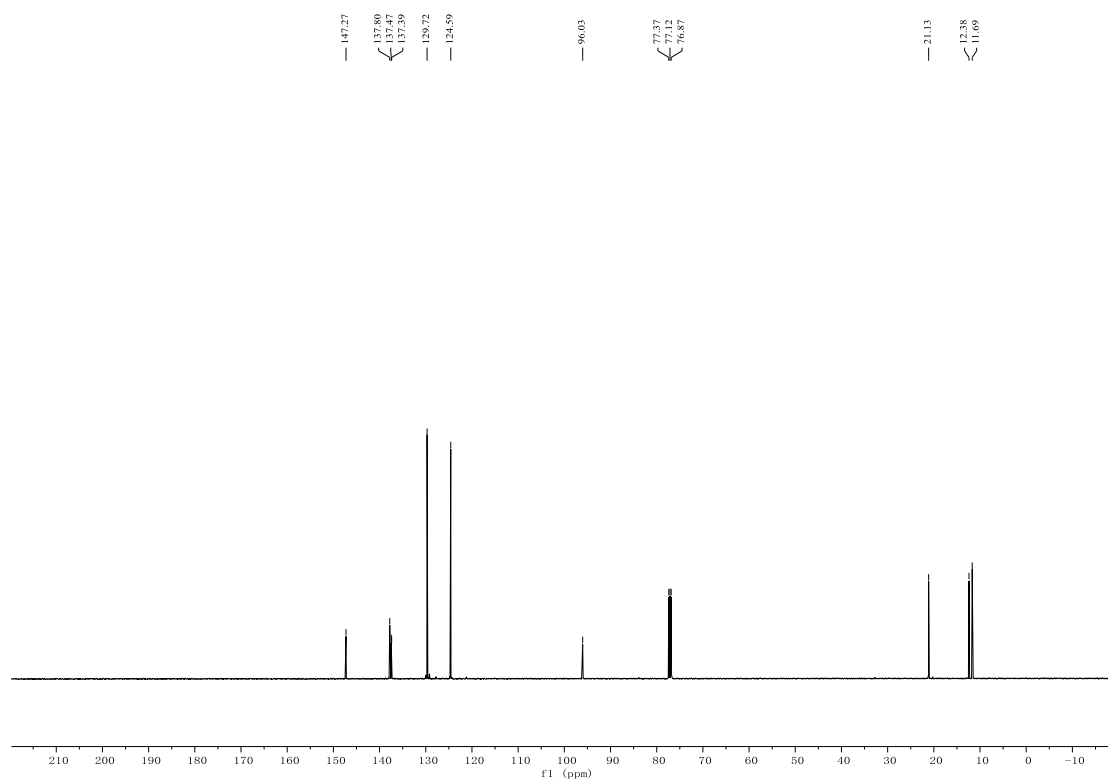

<sup>13</sup>C NMR of compound **4baa**

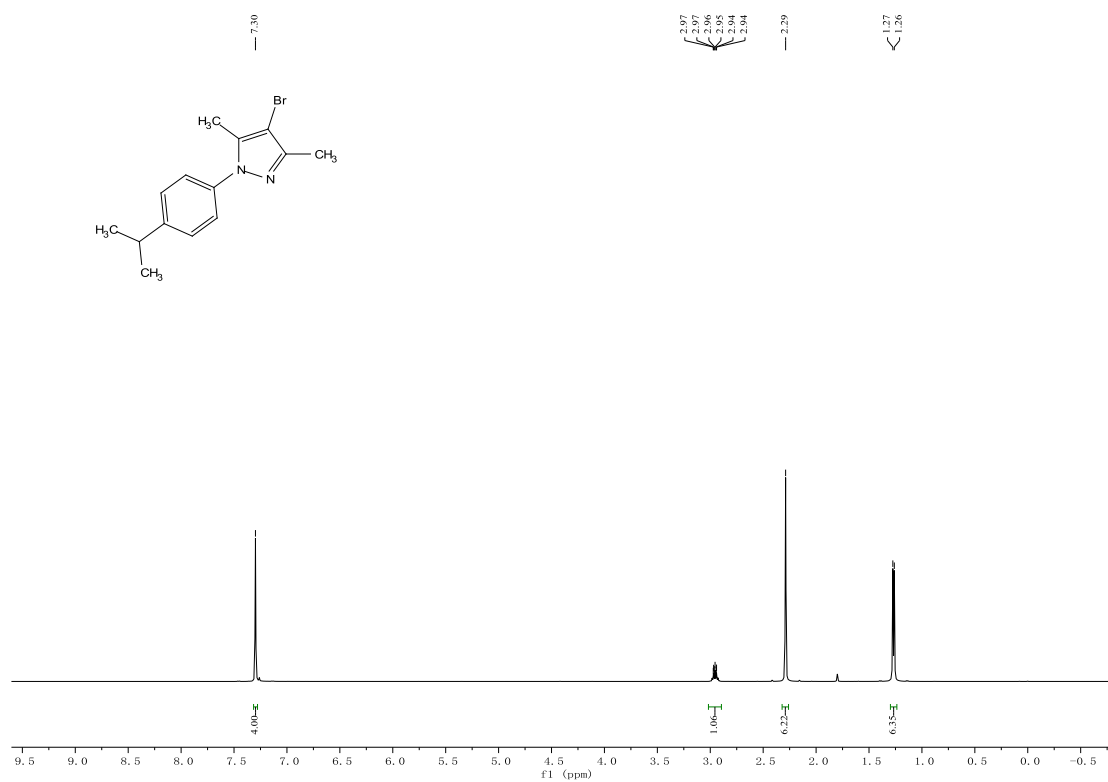

<sup>1</sup>H NMR of compound 4caa

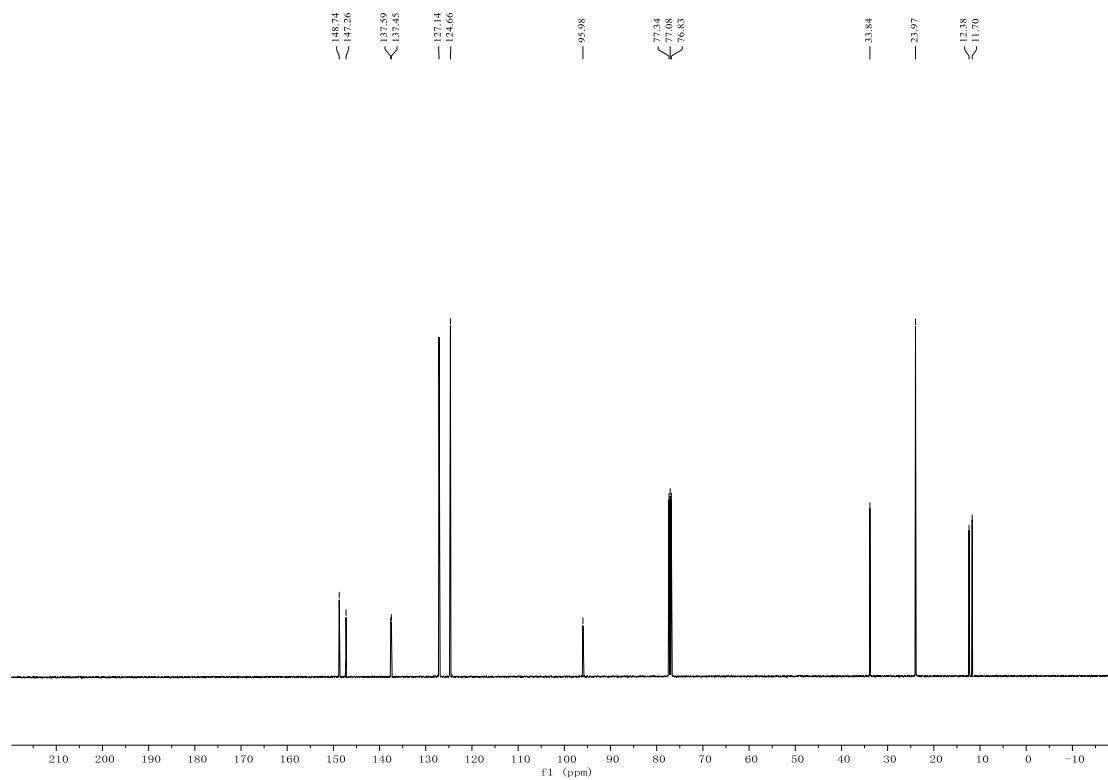

<sup>13</sup>C NMR of compound 4caa



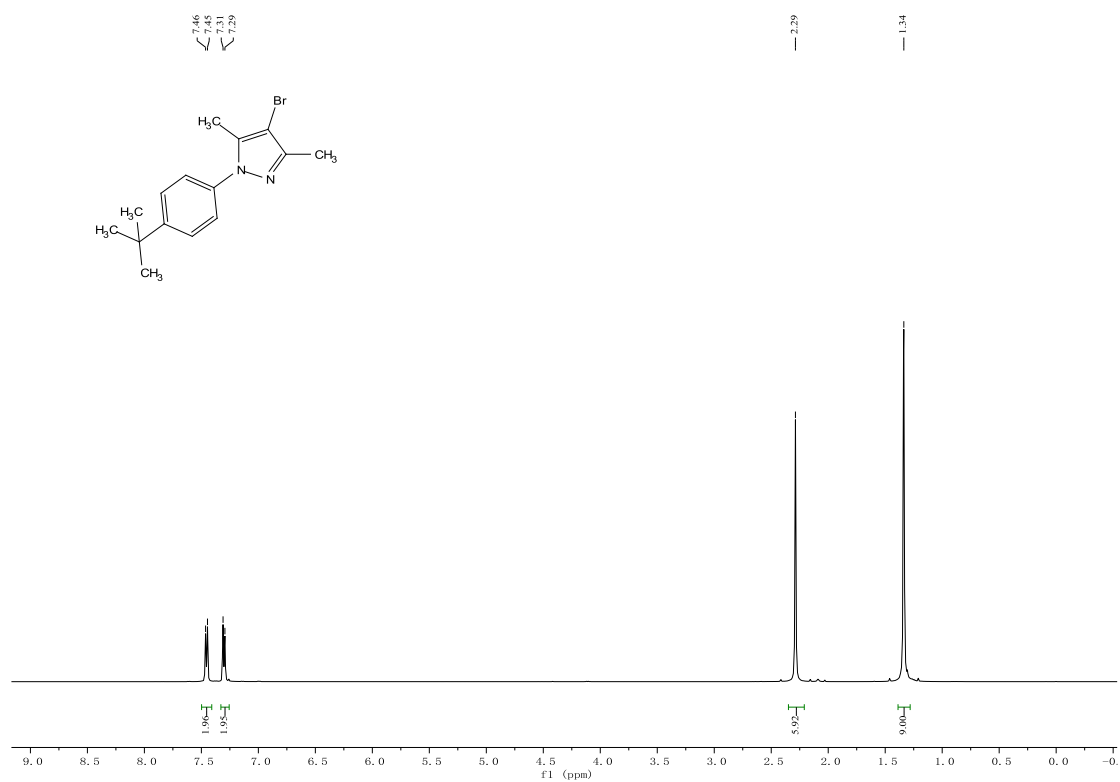

$^1\text{H}$  NMR of compound **4daa**

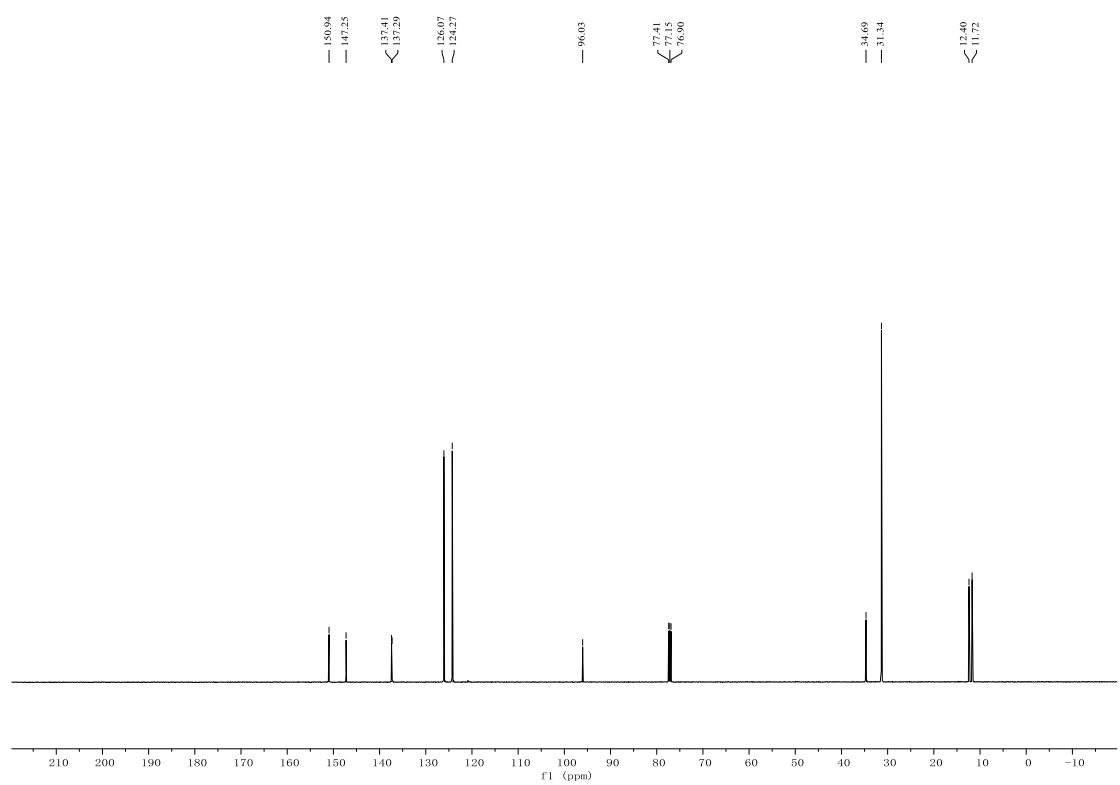

$^{13}\text{C}$  NMR of compound **4daa**

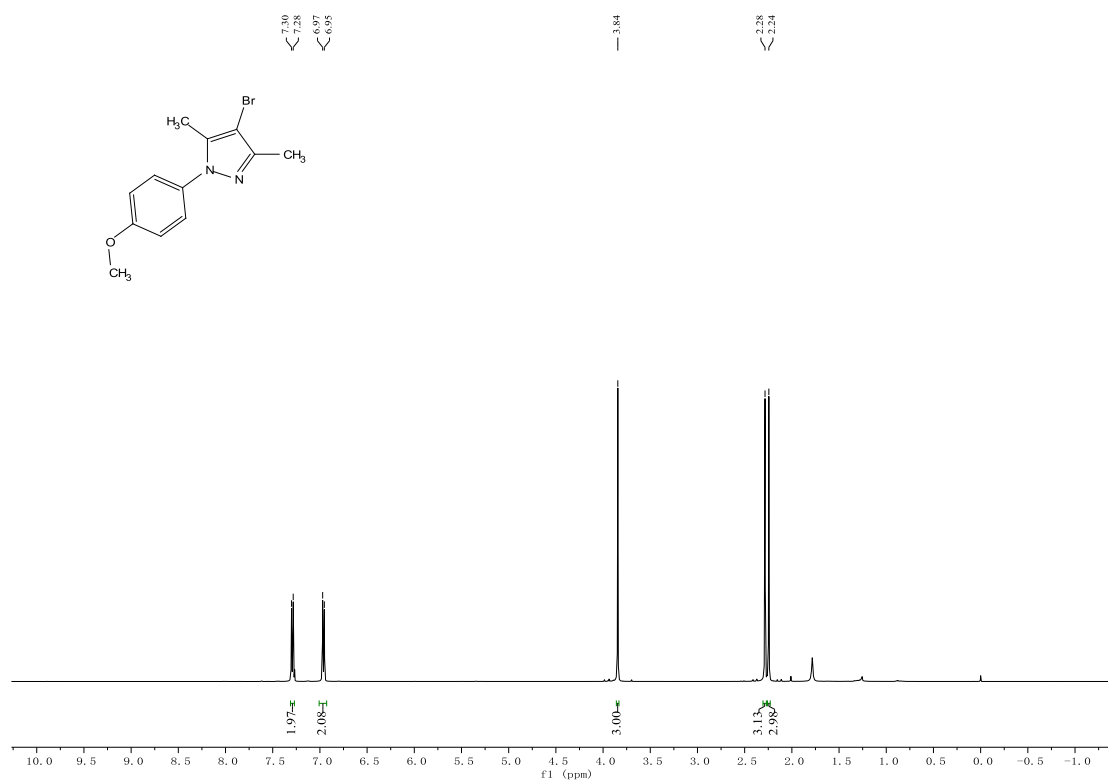

<sup>1</sup>H NMR of compound 4caa

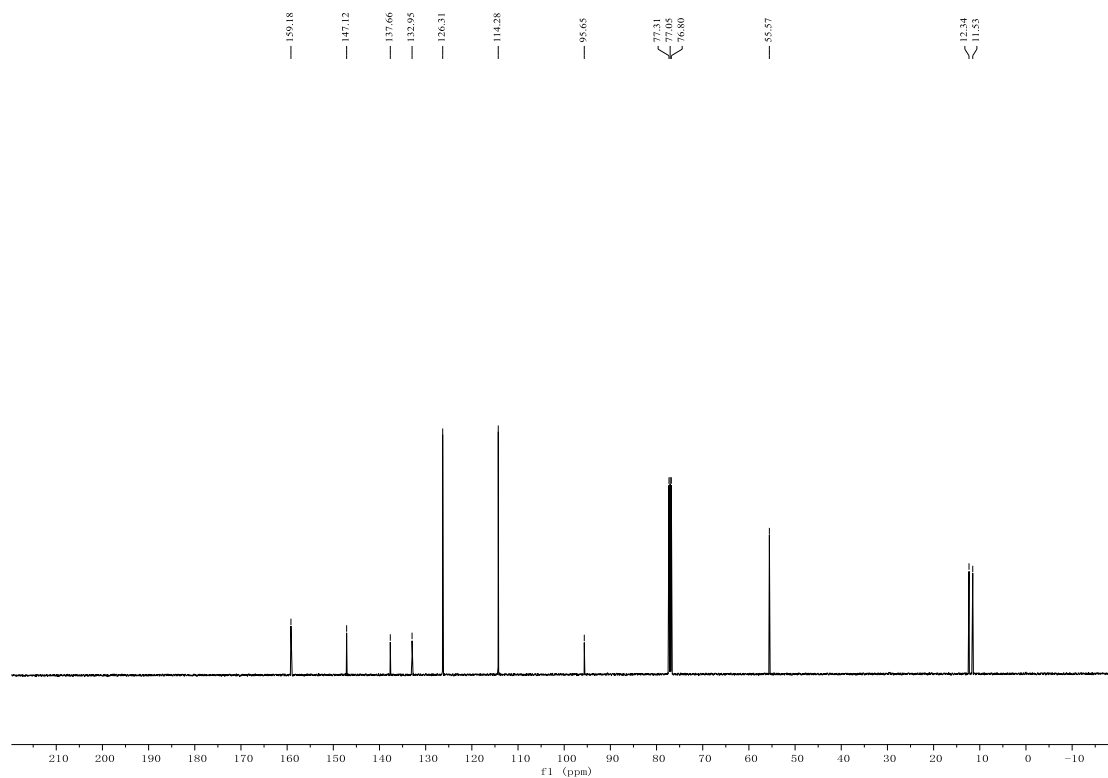

<sup>13</sup>C NMR of compound 4caa

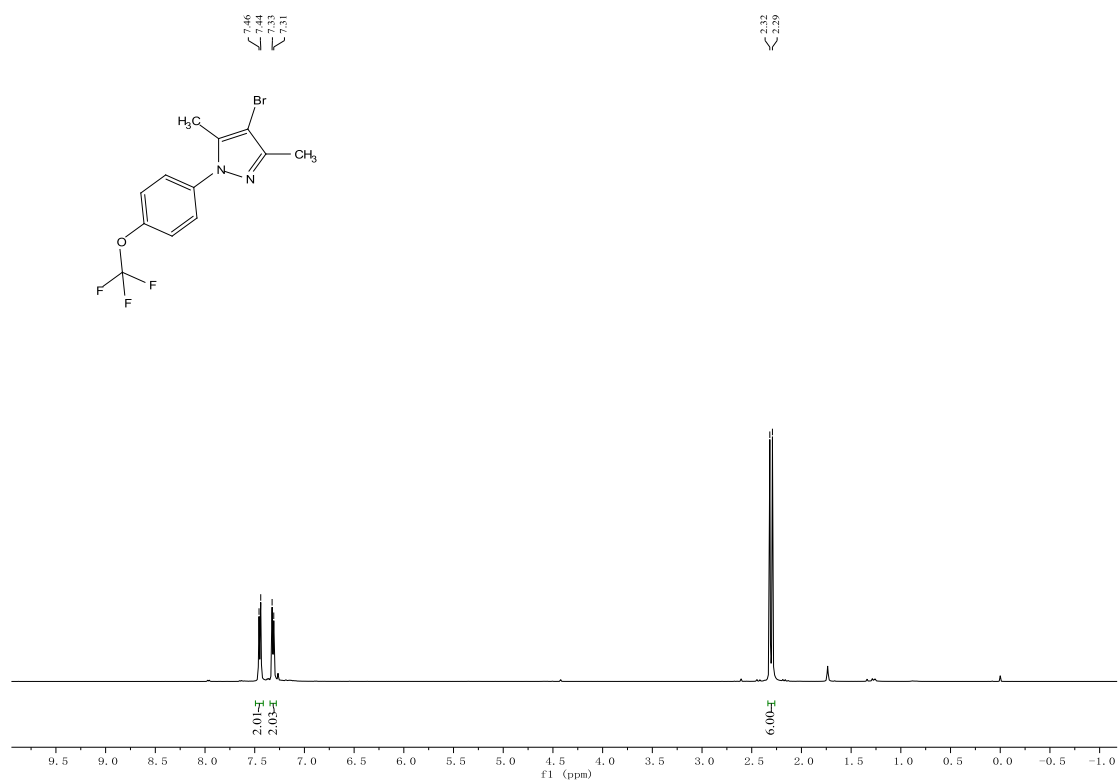

$^1\text{H}$  NMR of compound **4faa**

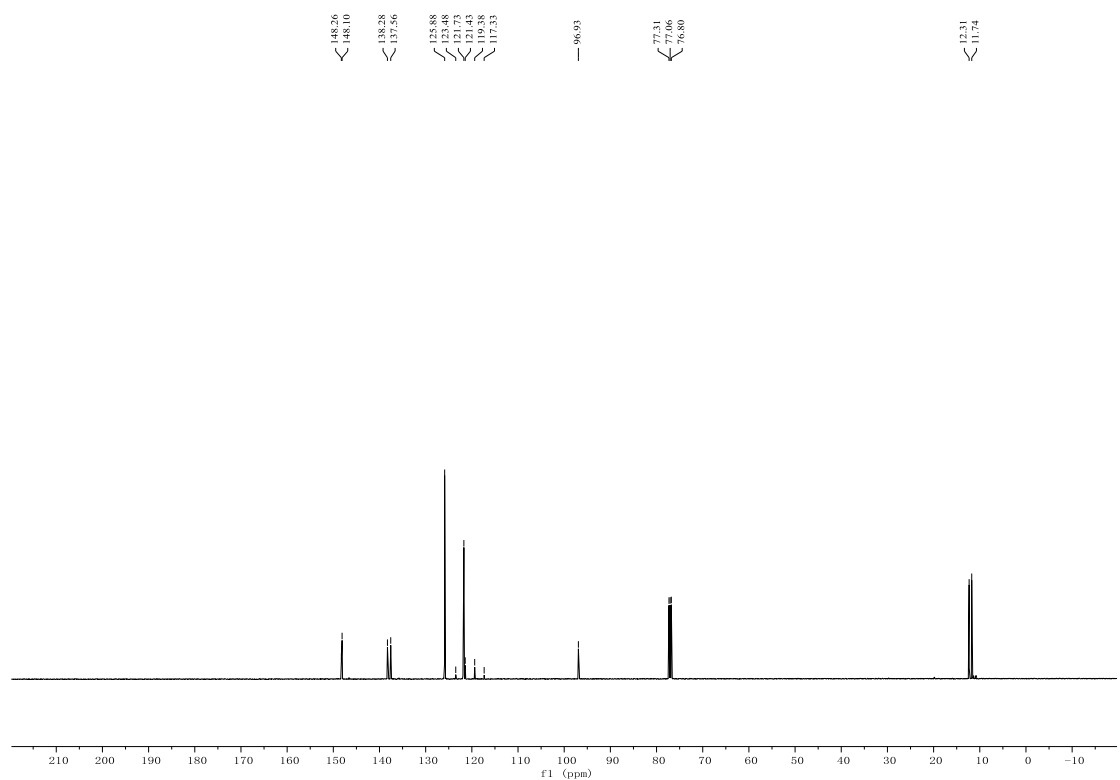

$^{13}\text{C}$  NMR of compound **4faa**

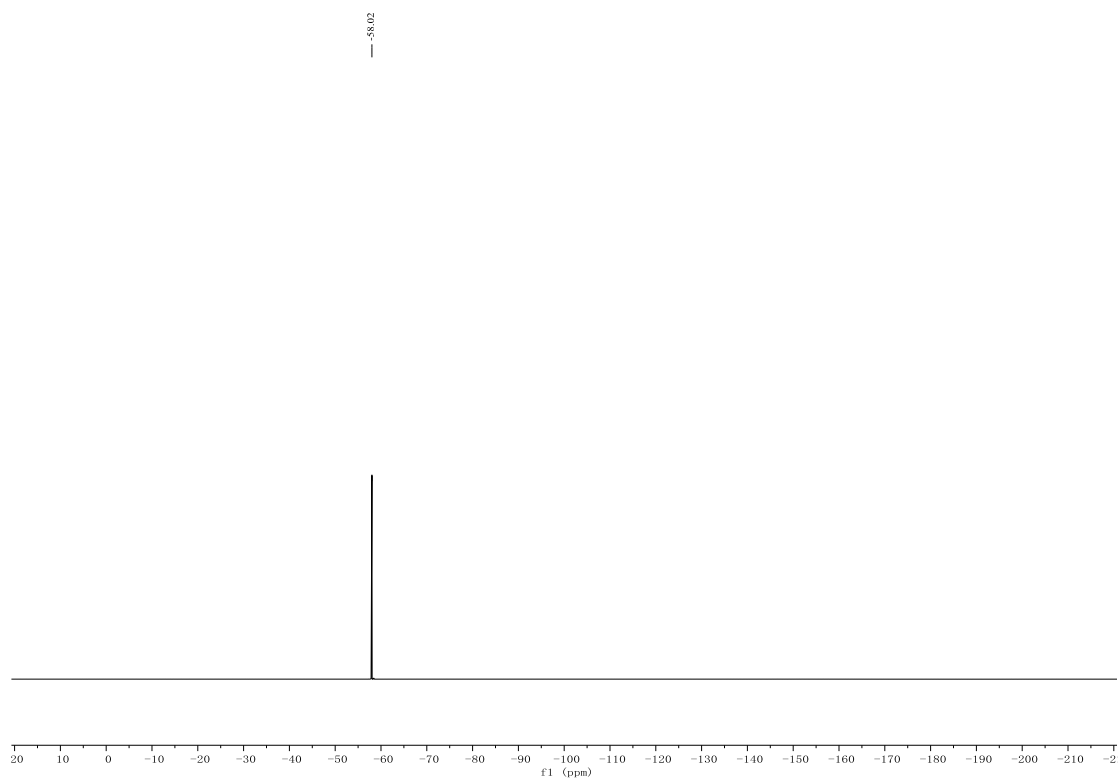

$^{19}\text{F}$  NMR of compound **4faa**

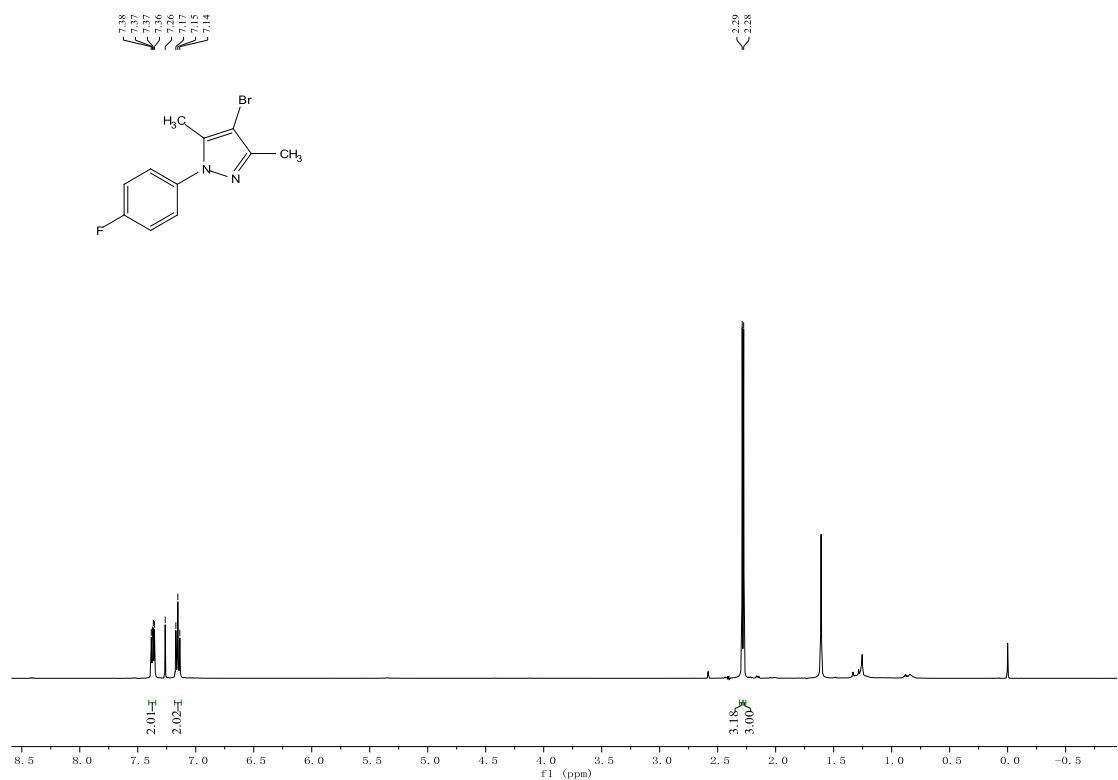

$^1\text{H}$  NMR of compound **4gaa**

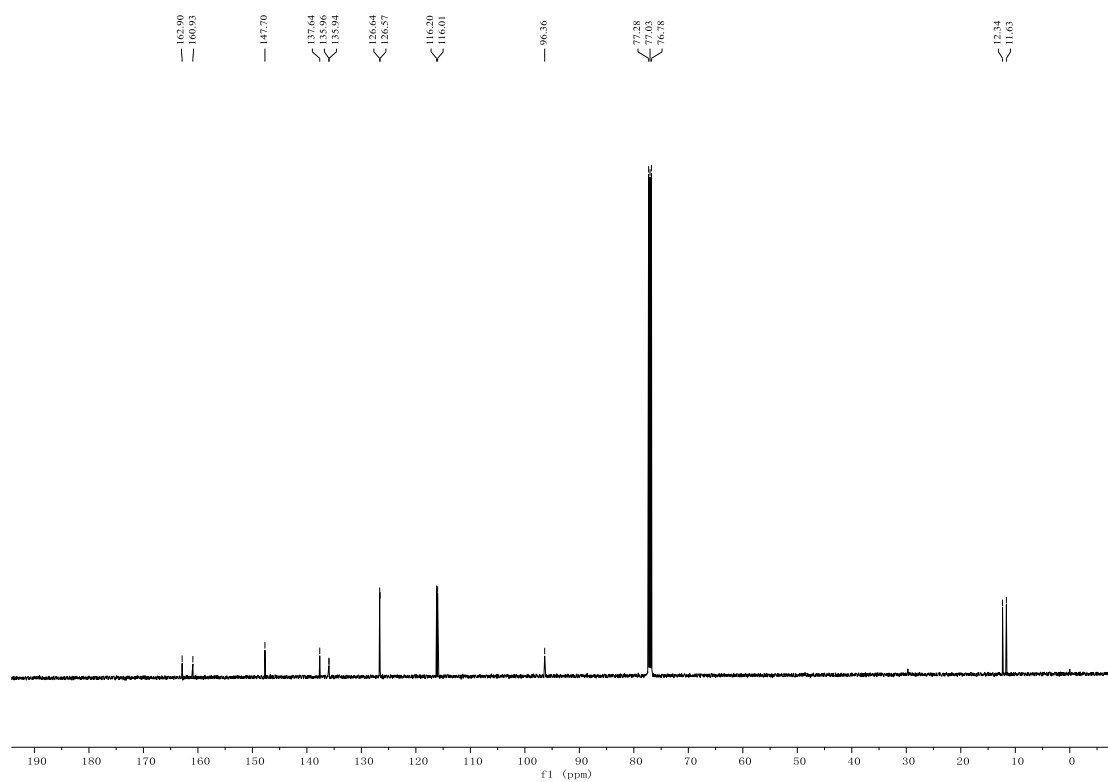

$^{13}\text{C}$  NMR of compound **4gaa**

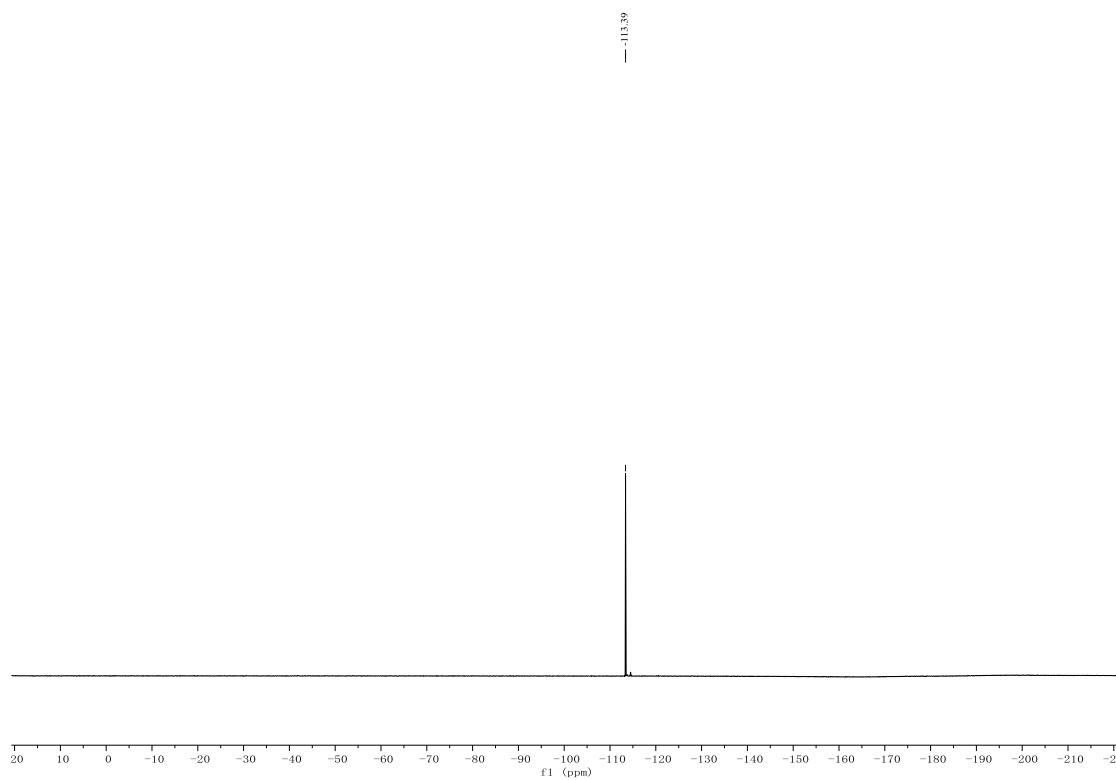

$^{19}\text{F}$  NMR of compound **4gaa**

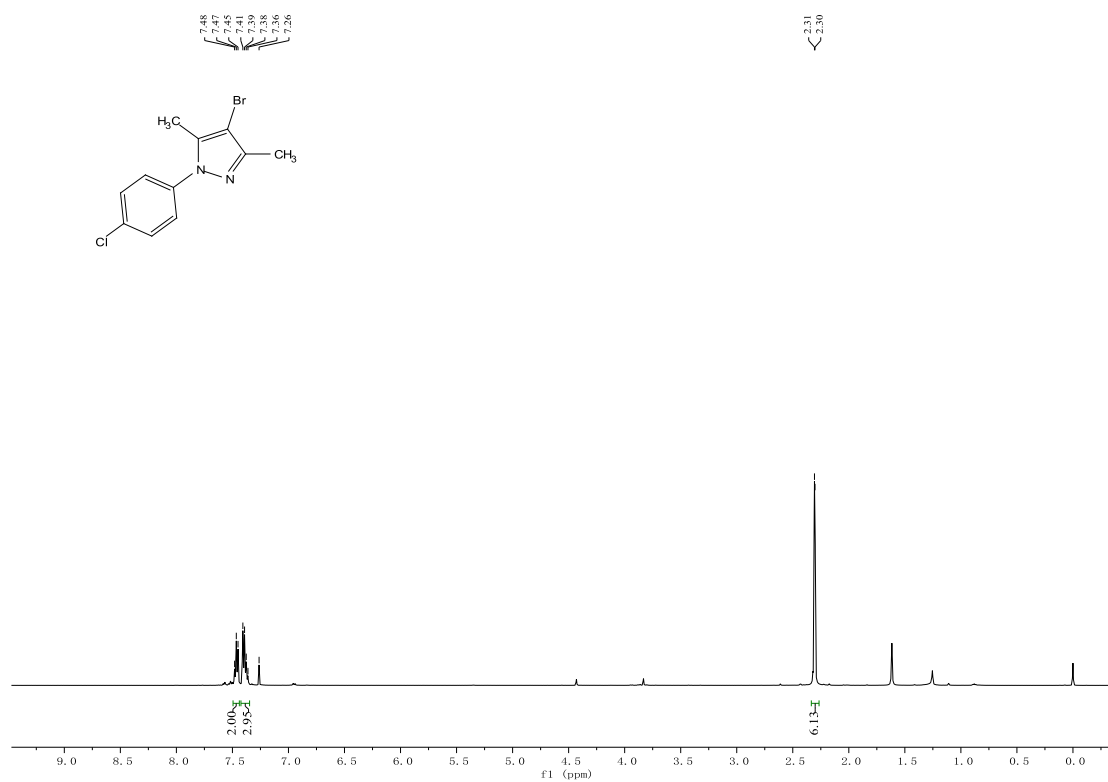

<sup>1</sup>H NMR of compound 4haa

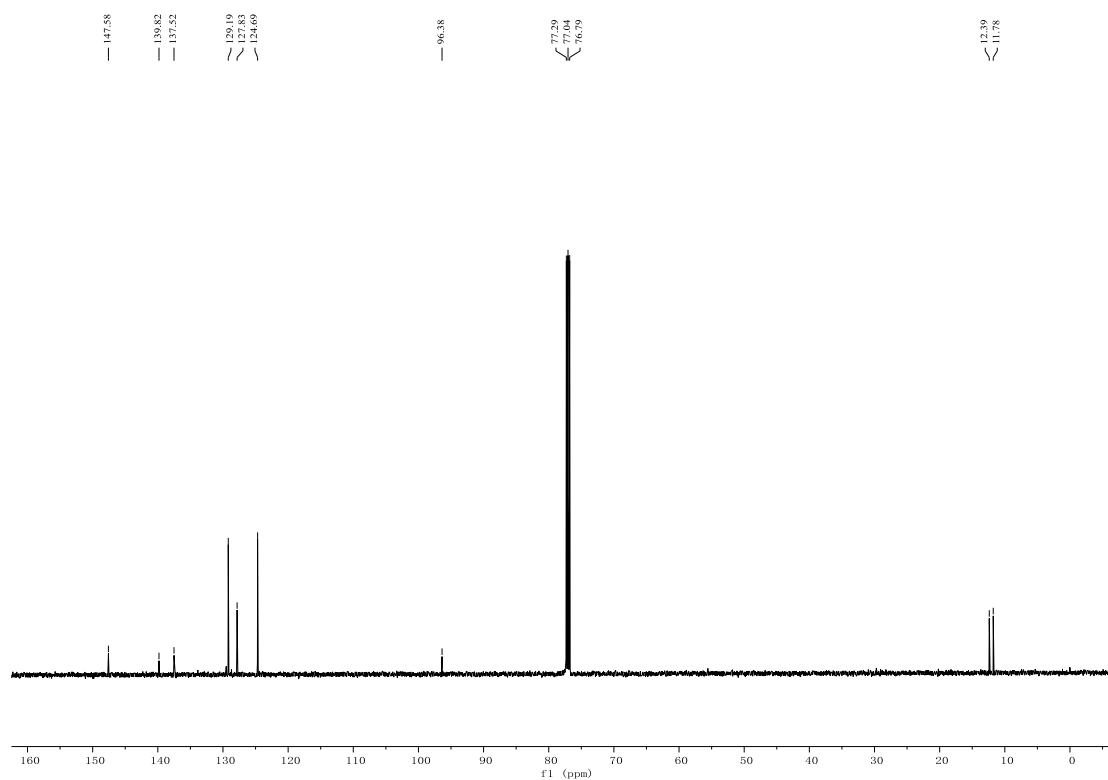

<sup>13</sup>C NMR of compound 4haa

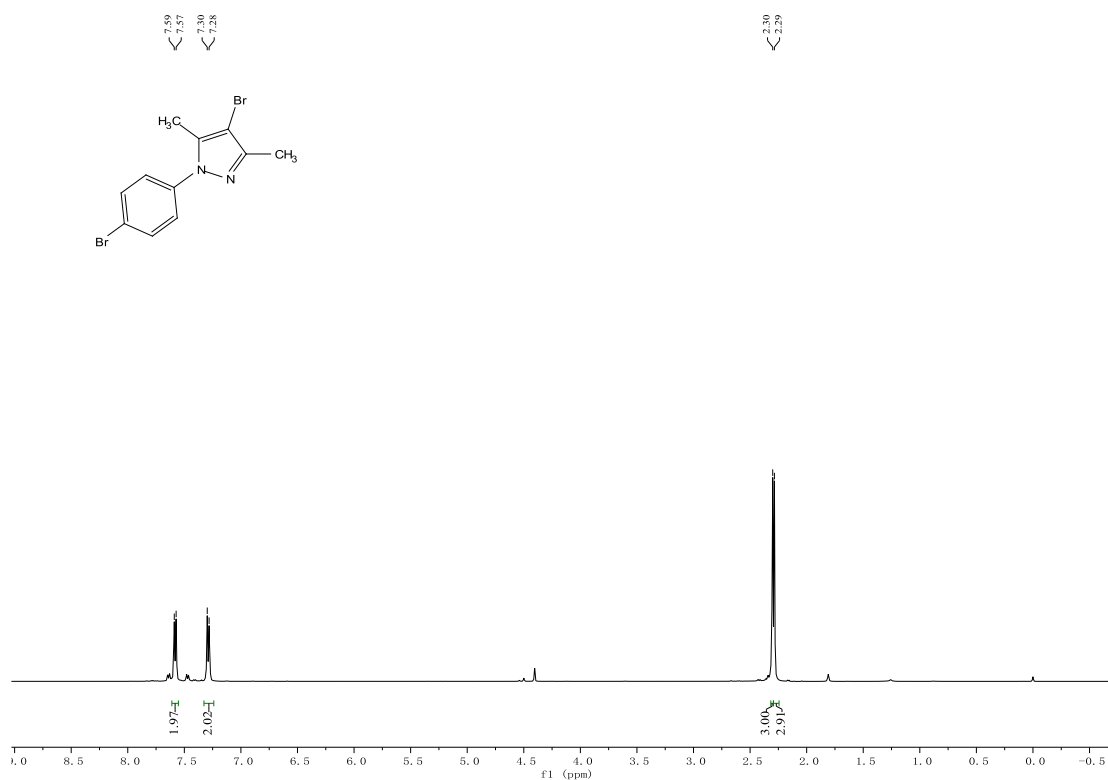

<sup>1</sup>H NMR of compound **4iaa**

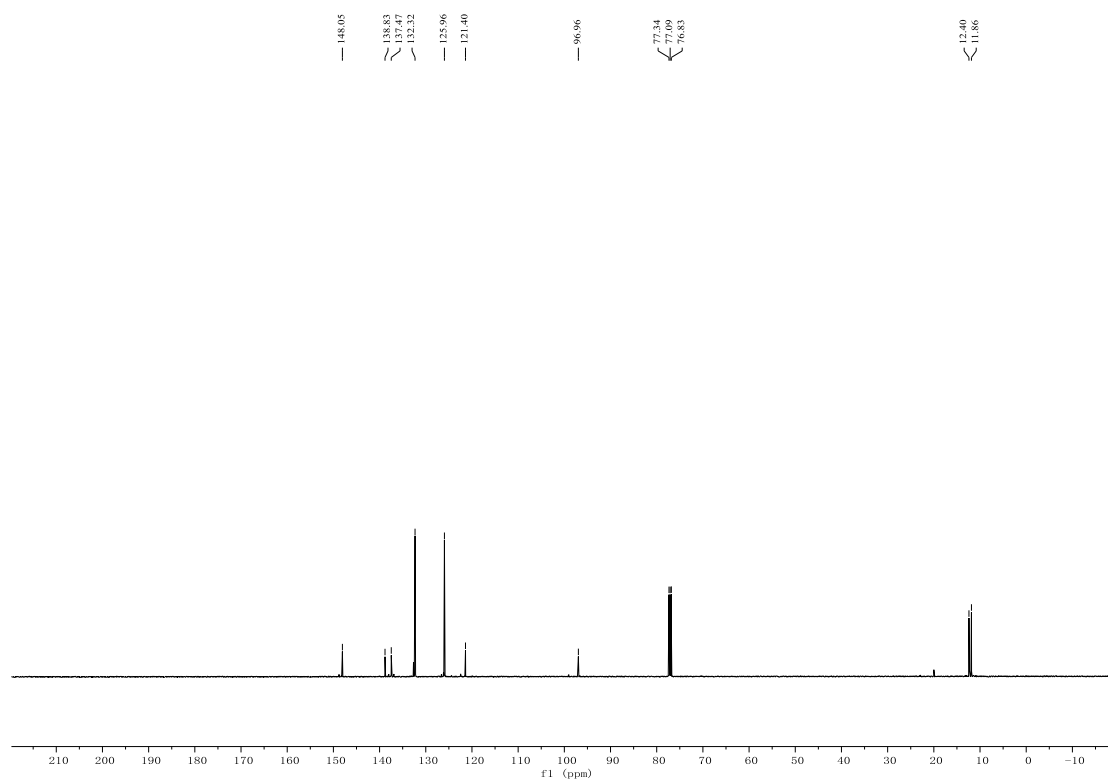

<sup>13</sup>C NMR of compound **4iaa**

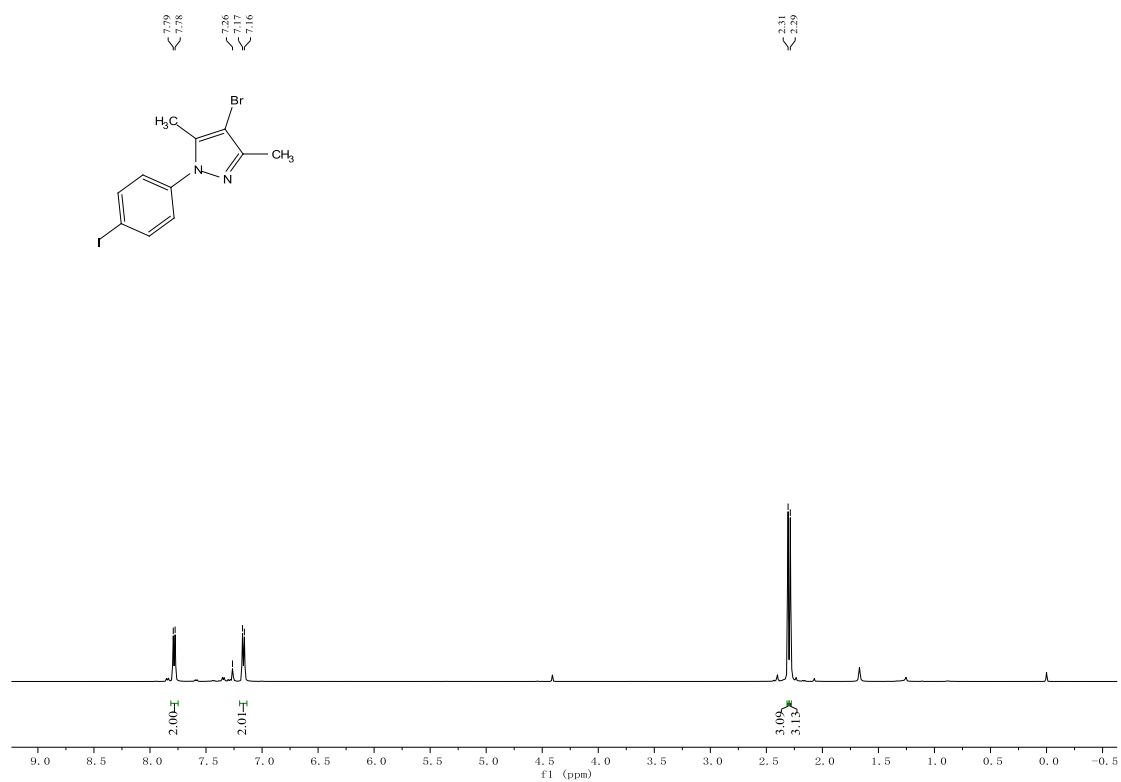

<sup>1</sup>H NMR of compound **4jaa**

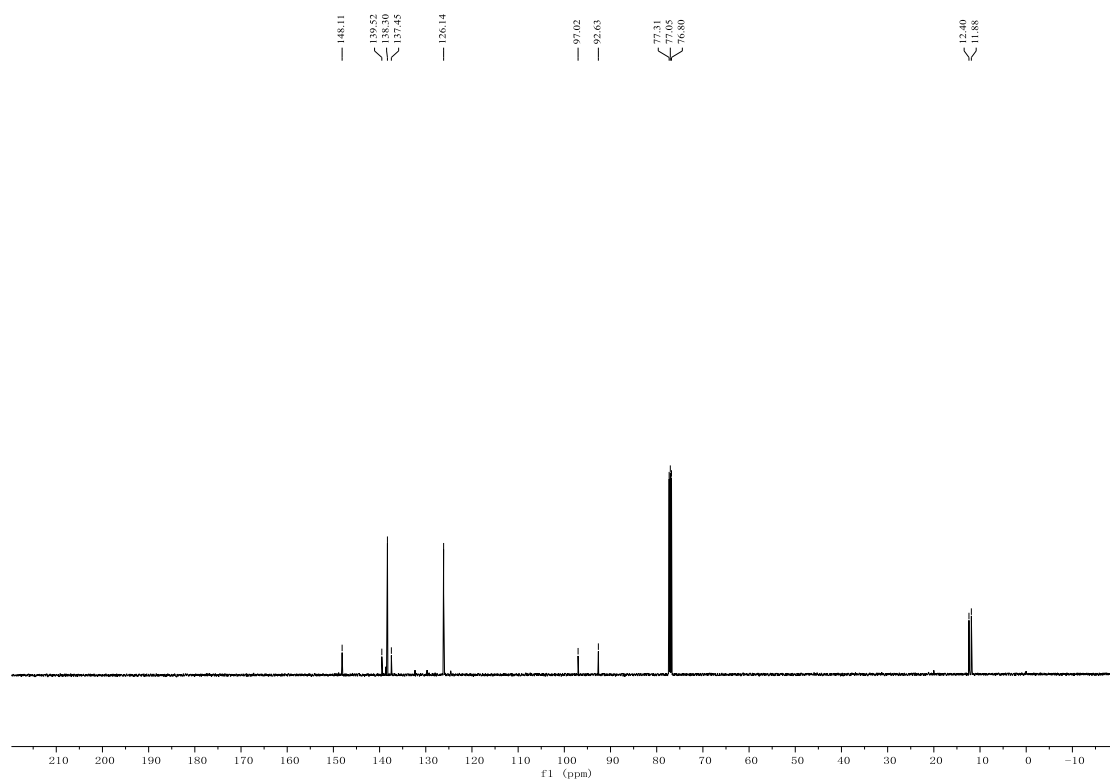

<sup>13</sup>C NMR of compound **4jaa**



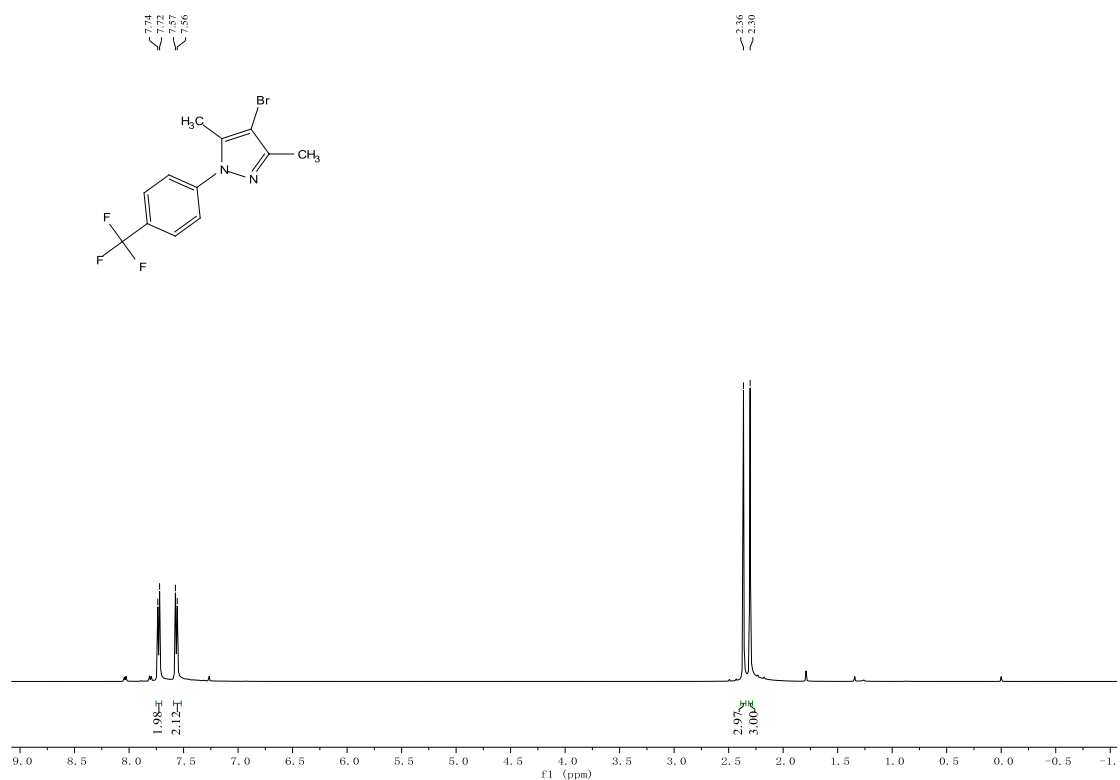

<sup>1</sup>H NMR of compound **4kaa**

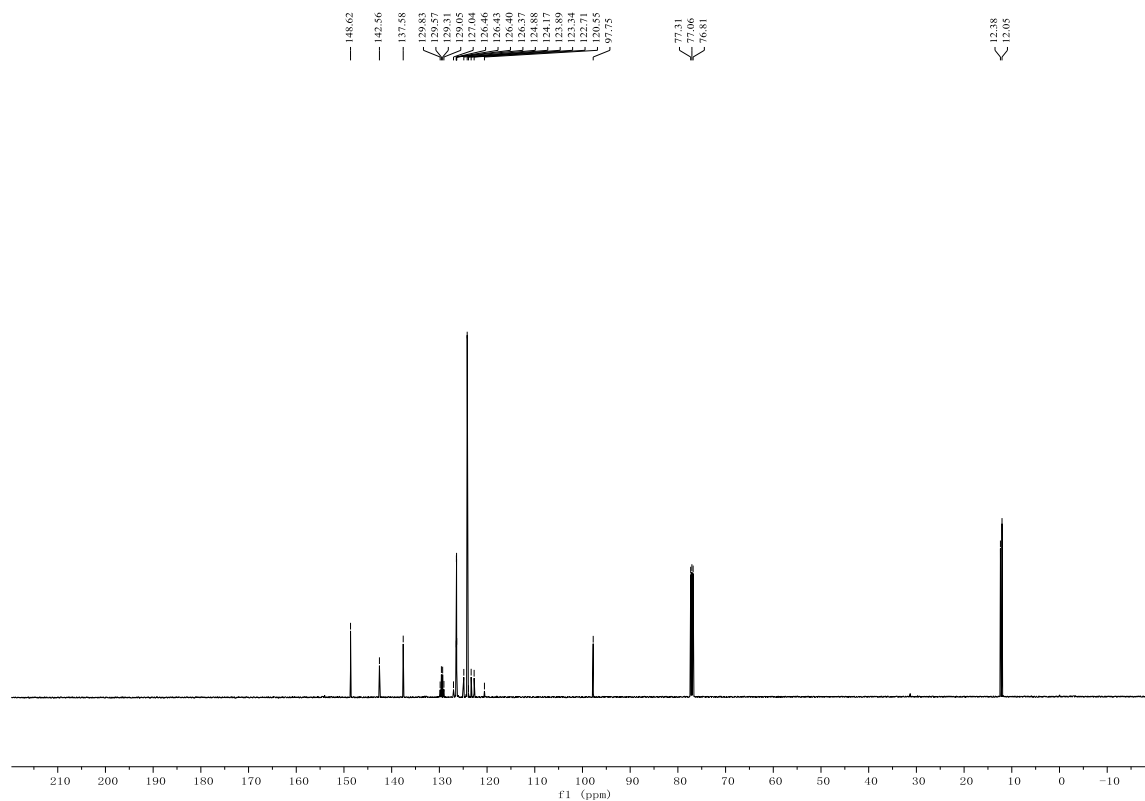

<sup>13</sup>C NMR of compound **4kaa**

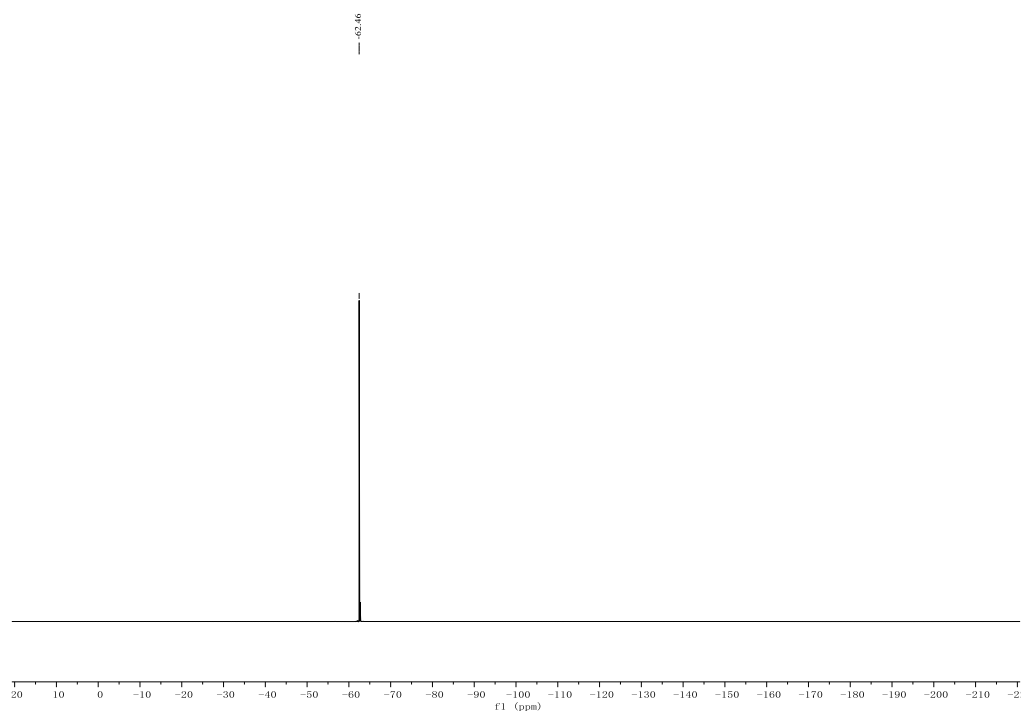

$^{19}\text{F}$  NMR of compound **4kaa**

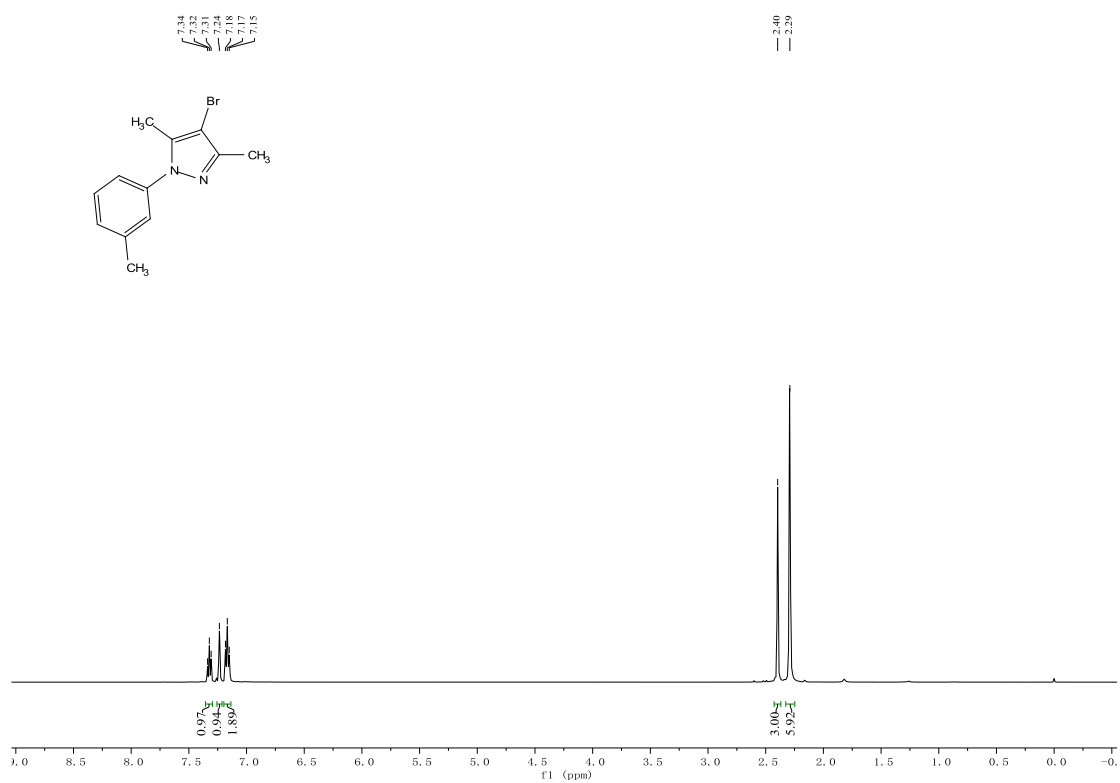

$^1\text{H}$  NMR of compound **4laa**

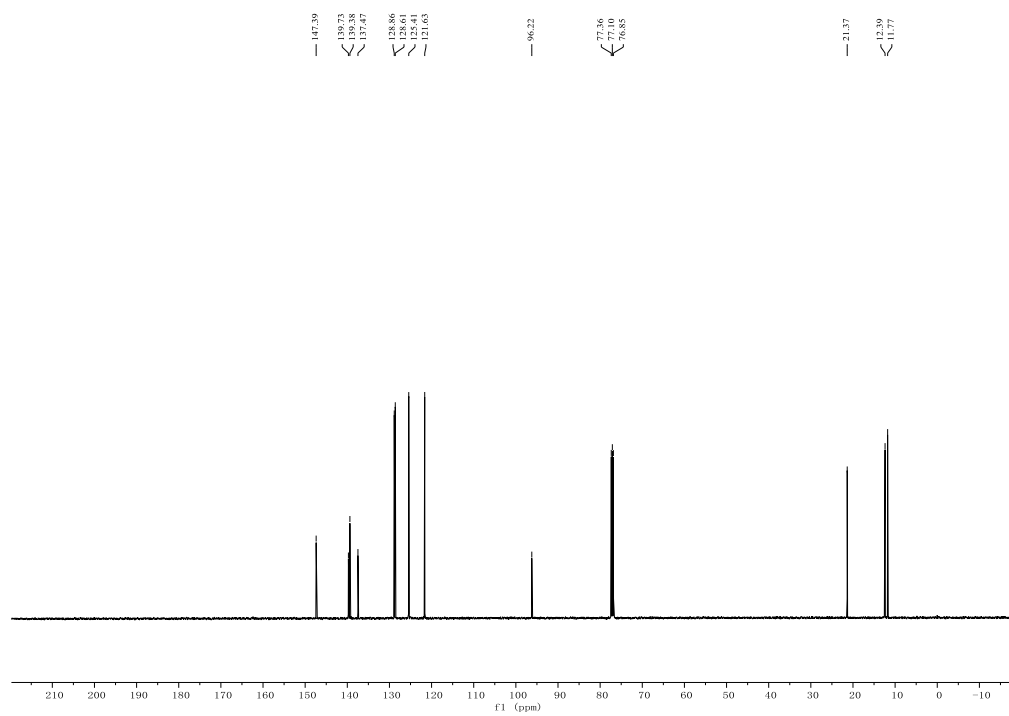

<sup>13</sup>C NMR of compound **4laa**

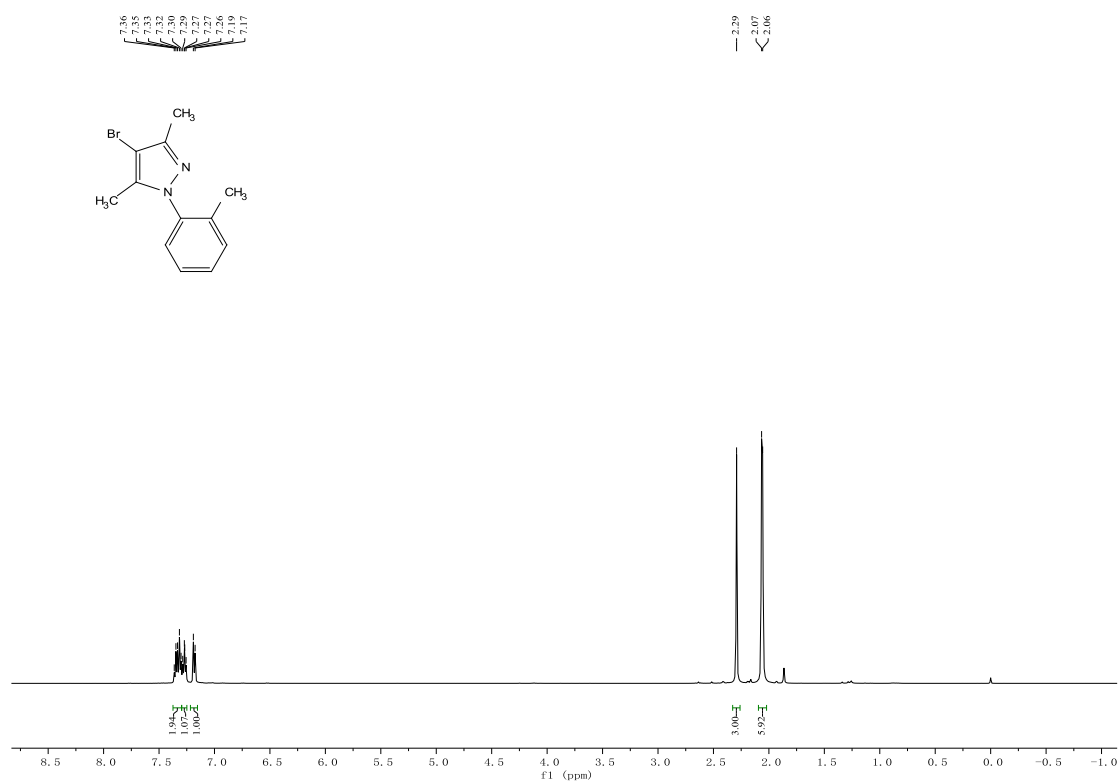

<sup>1</sup>H NMR of compound **4maa**

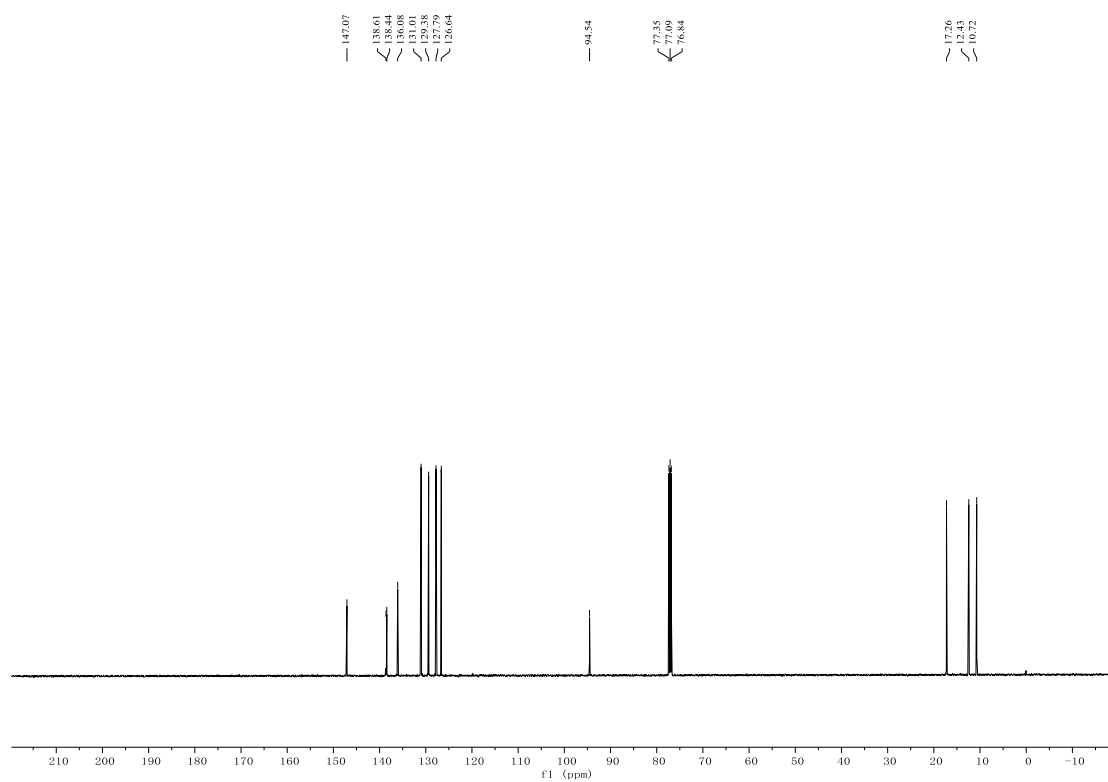

<sup>13</sup>C NMR of compound **4maa**

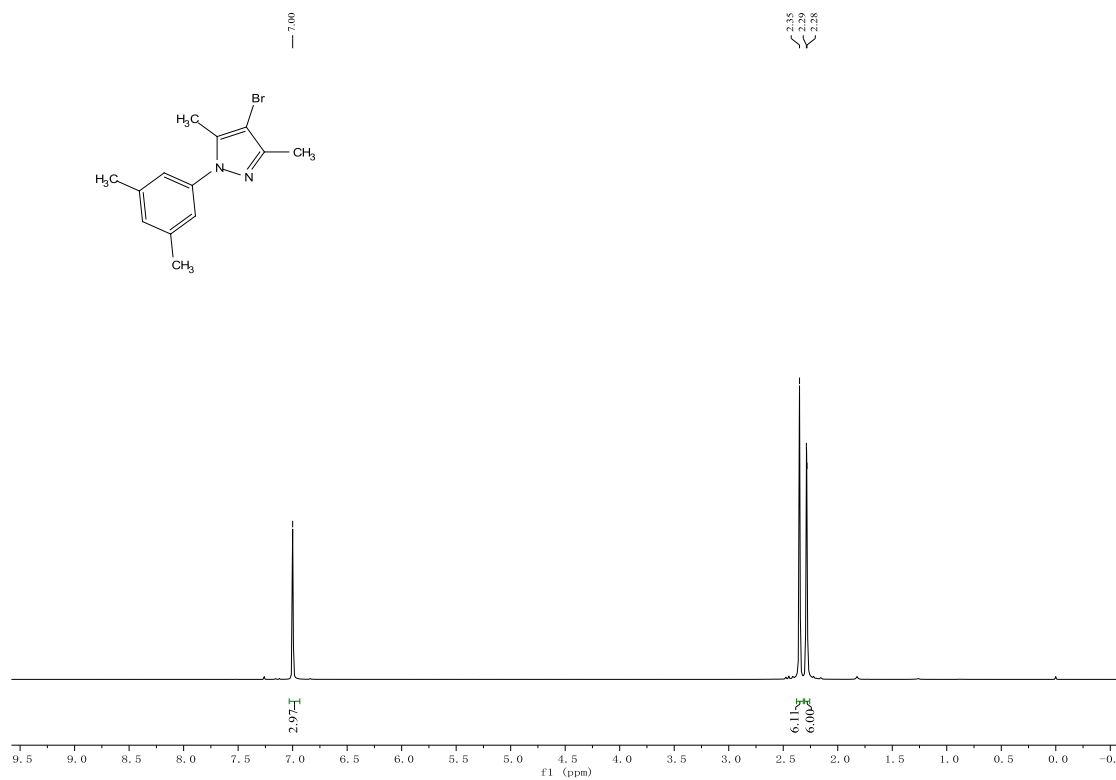

<sup>1</sup>H NMR of compound **4naa**

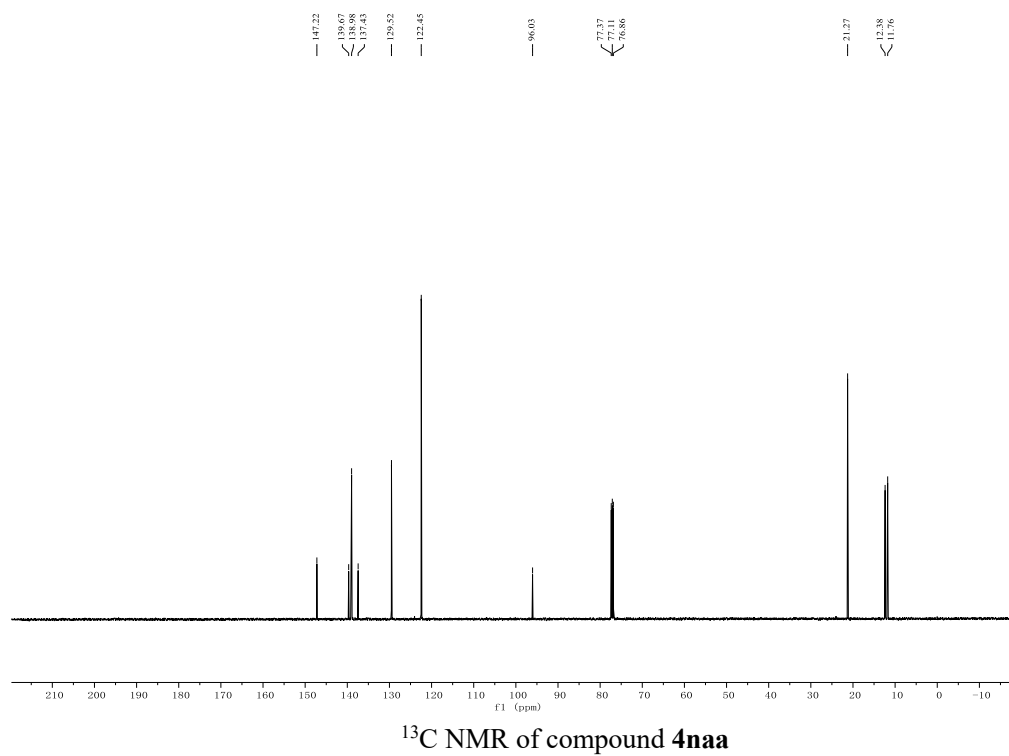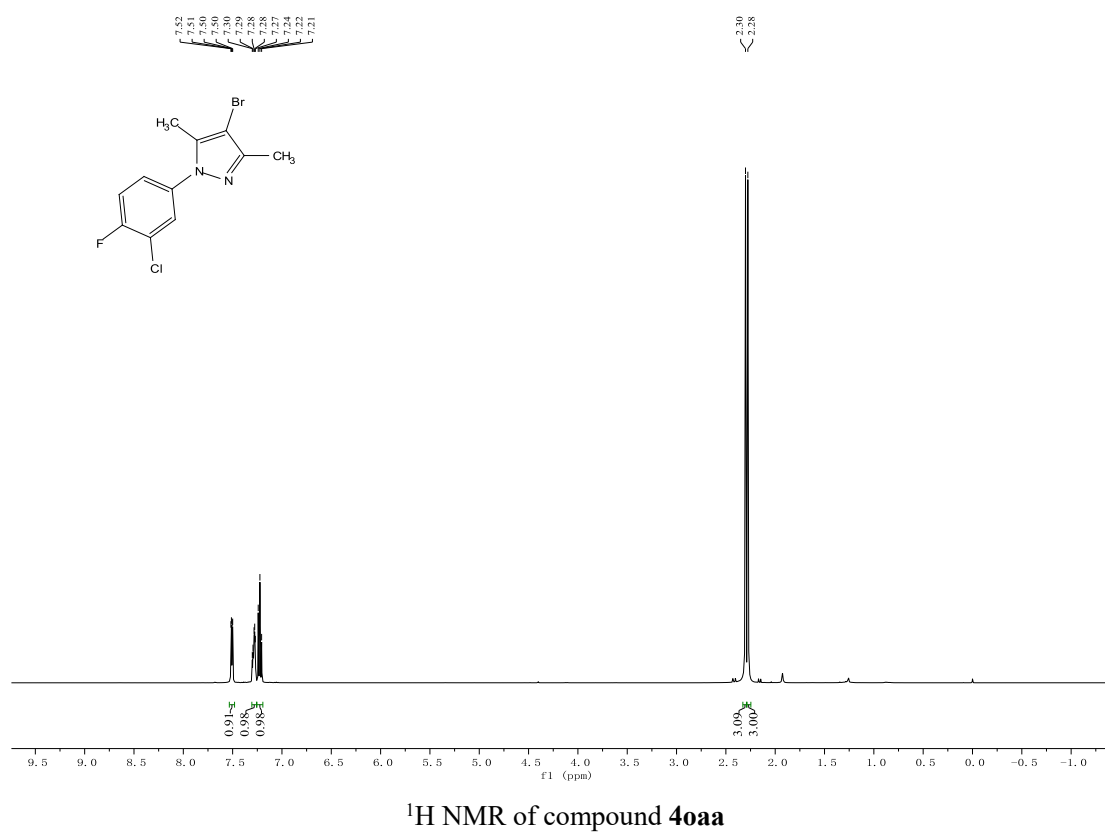

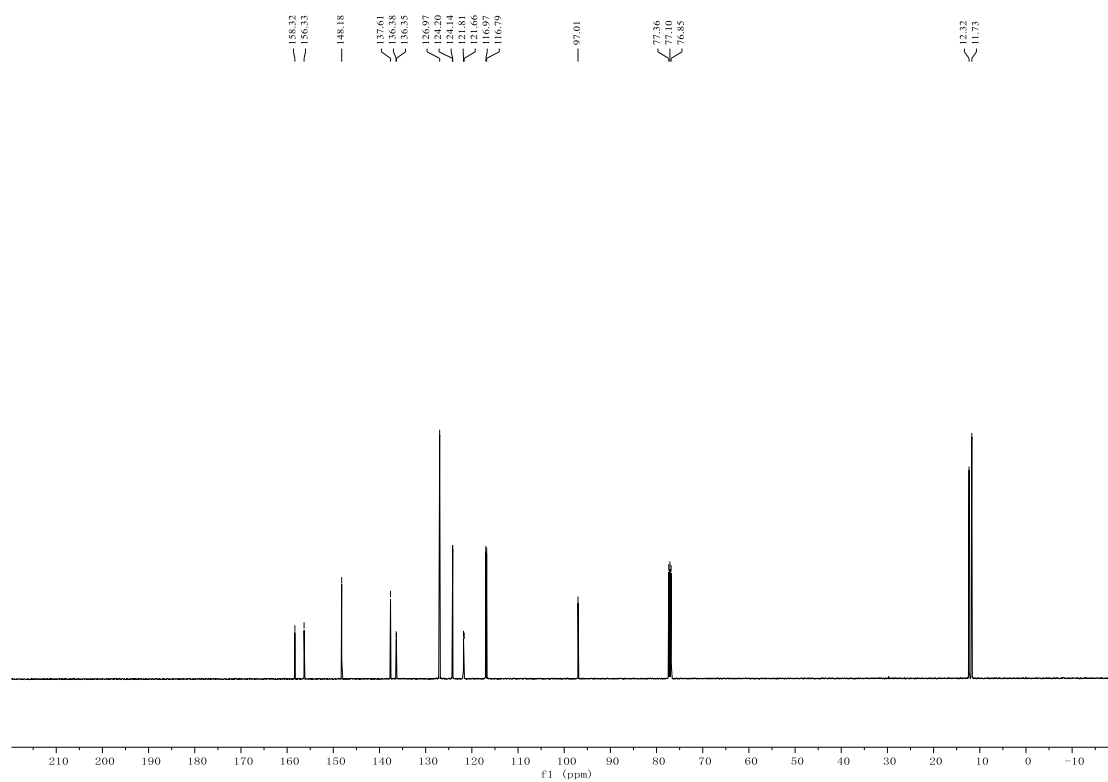

$^{13}\text{C}$  NMR of compound **4aaa**

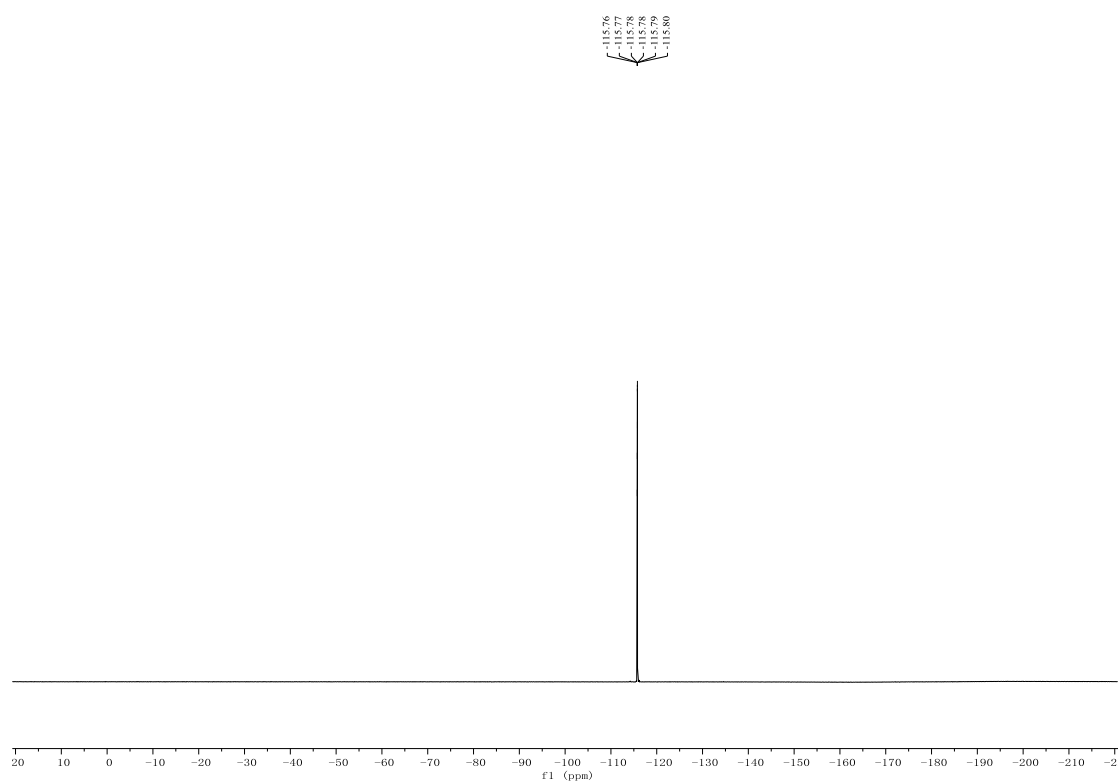

$^{19}\text{F}$  NMR of compound **4aaa**

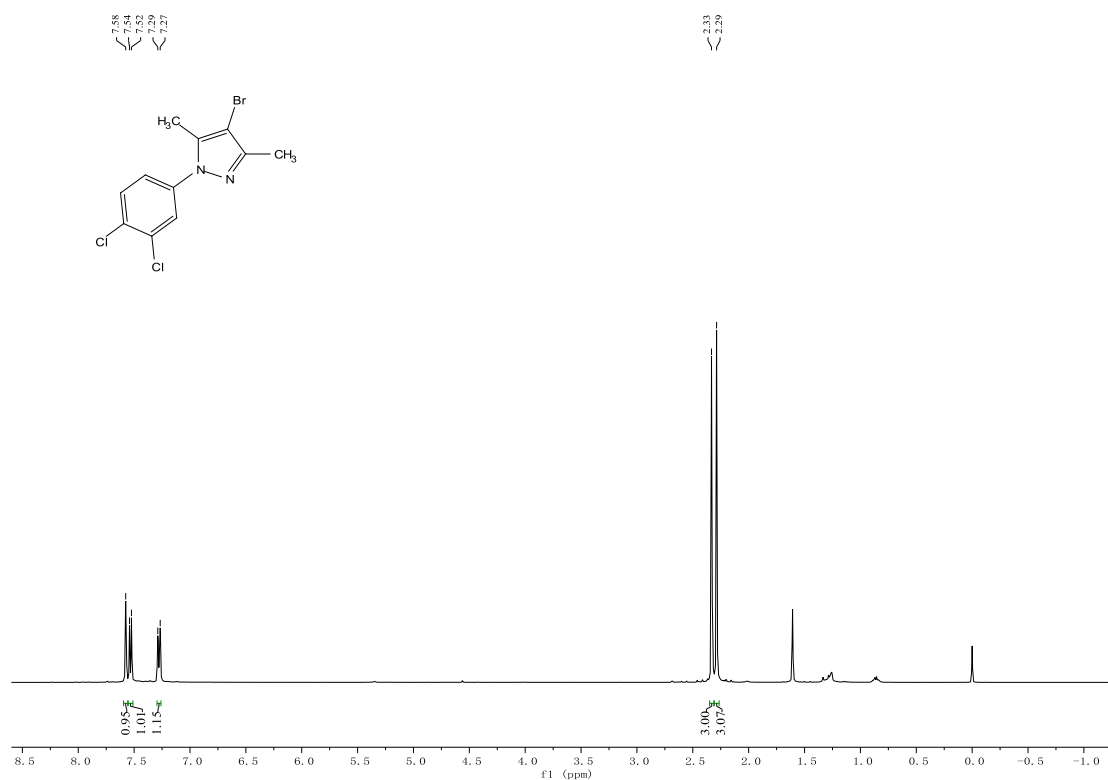

**<sup>1</sup>H NMR of compound 4paa**

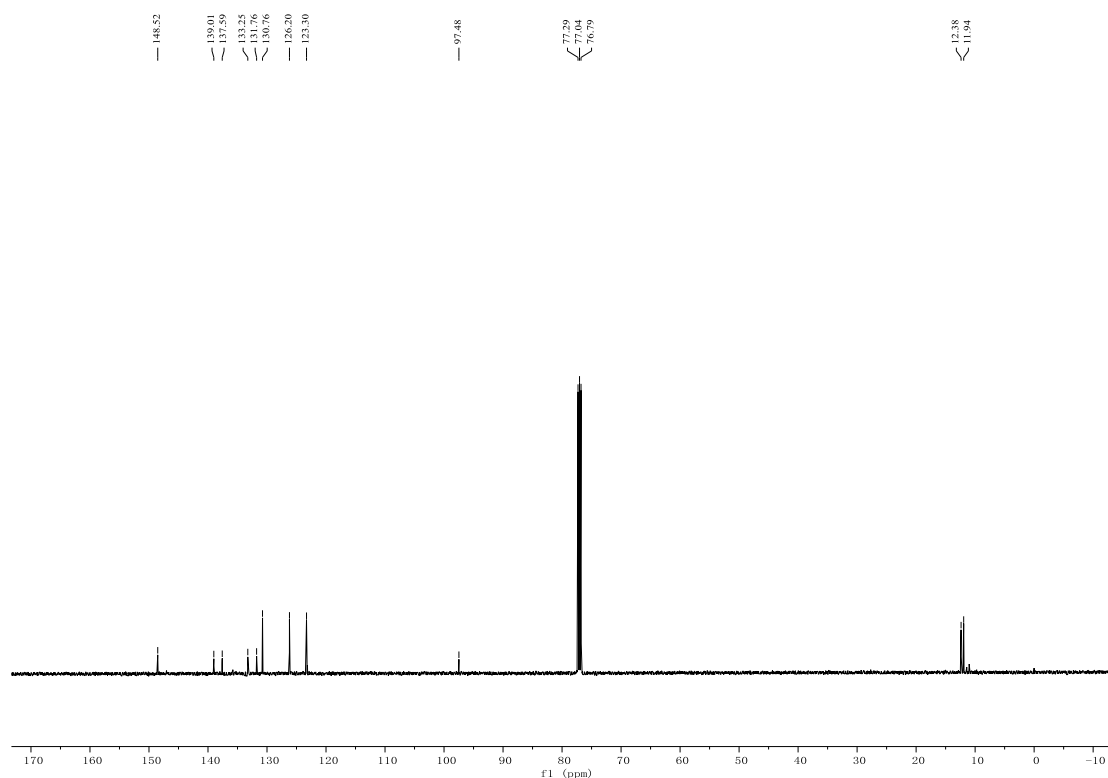

**<sup>13</sup>C NMR of compound 4paa**

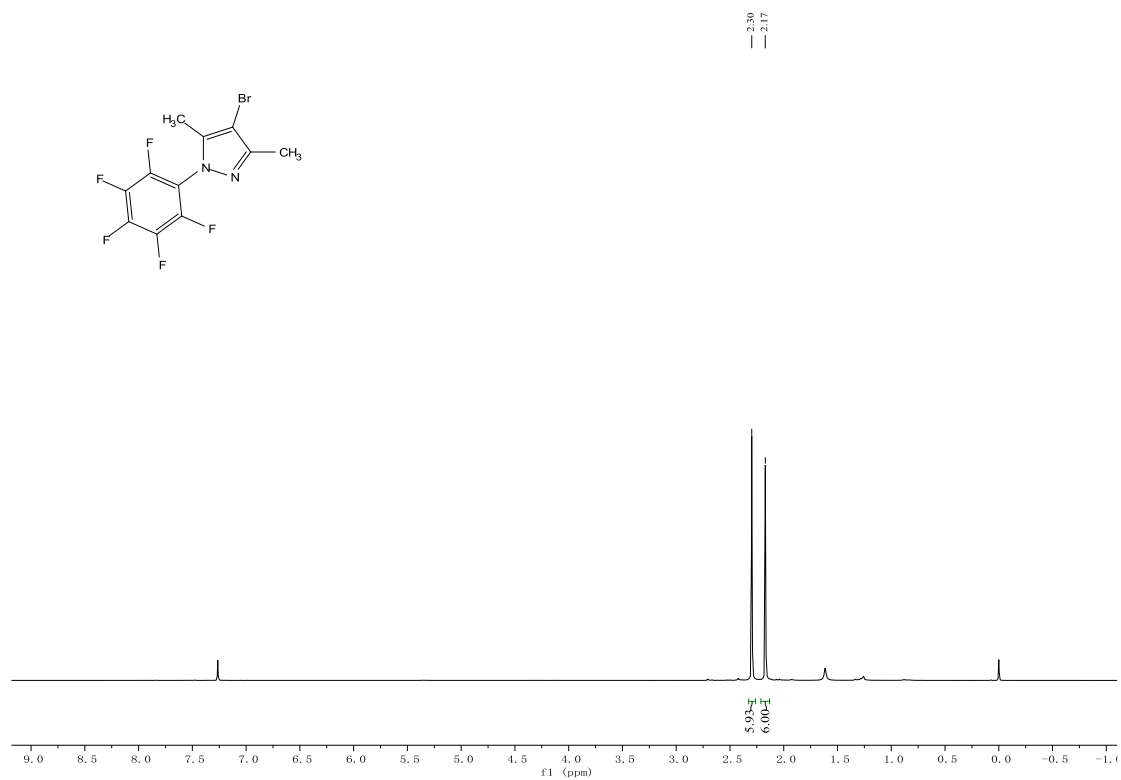

<sup>1</sup>H NMR of compound 4qaa

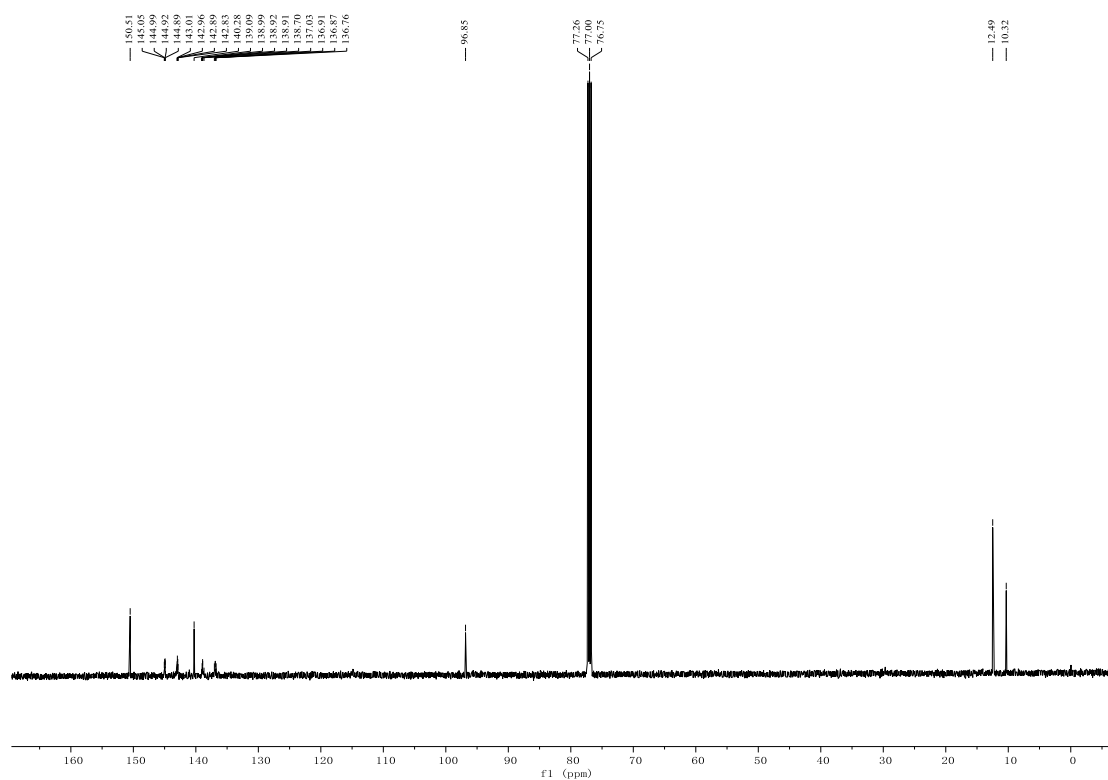

<sup>13</sup>C NMR of compound 4qaa



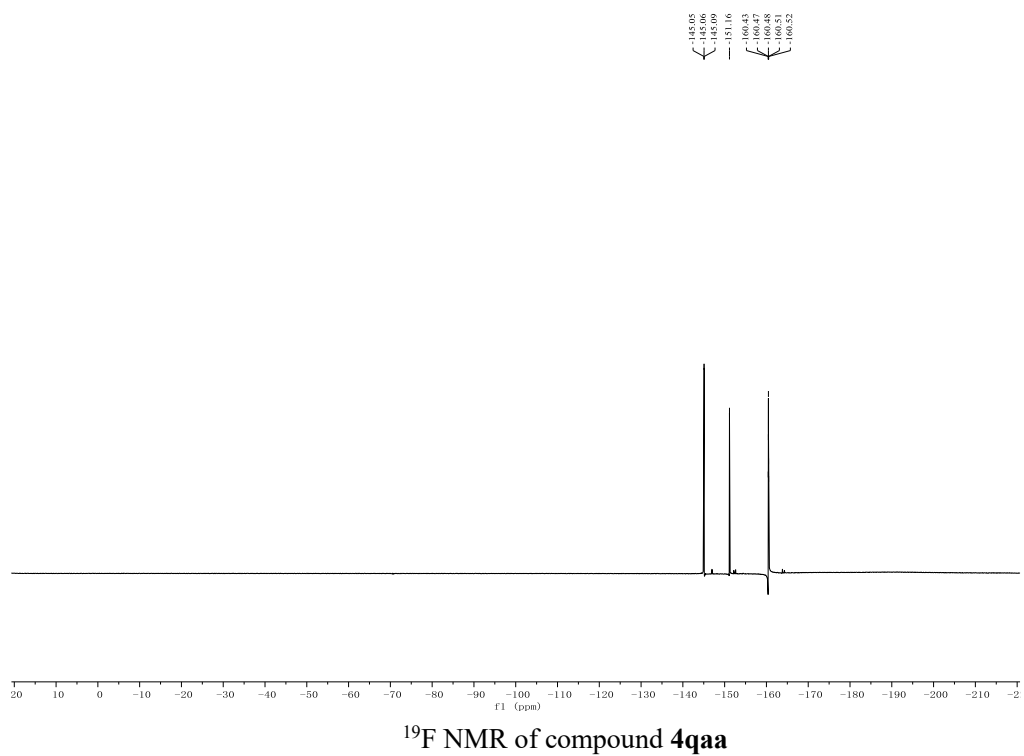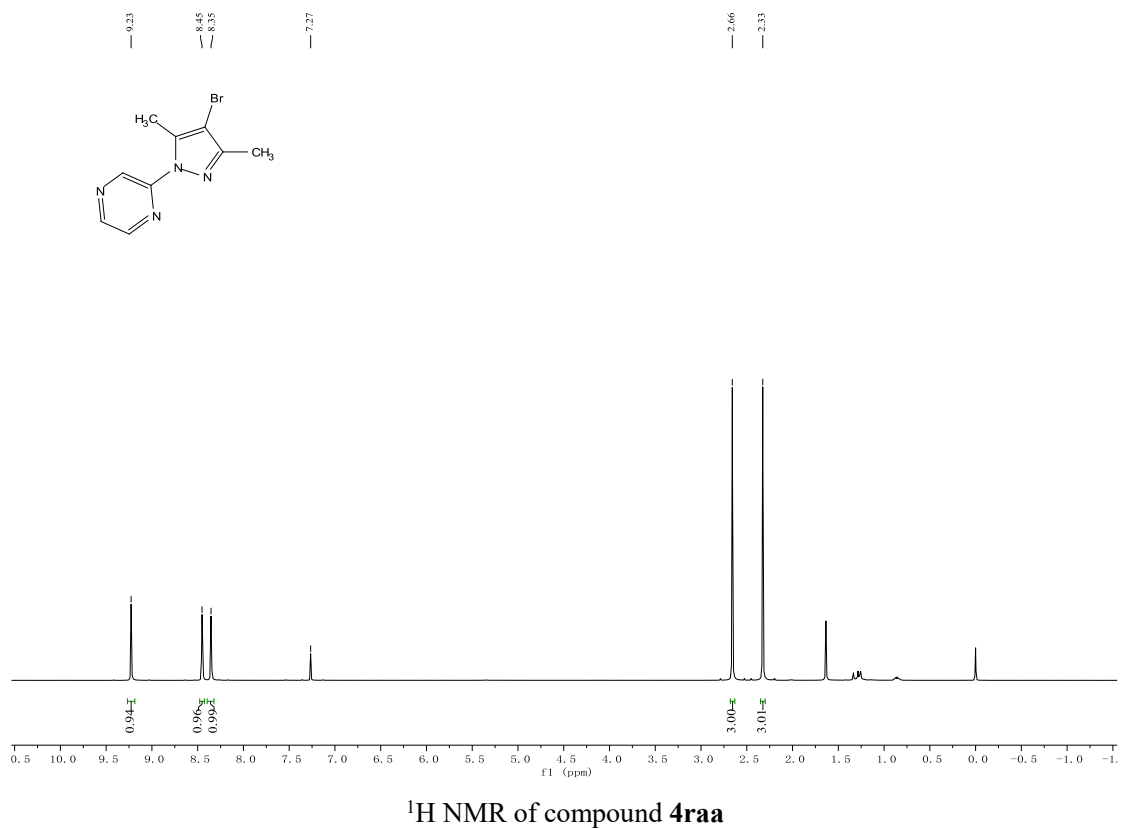

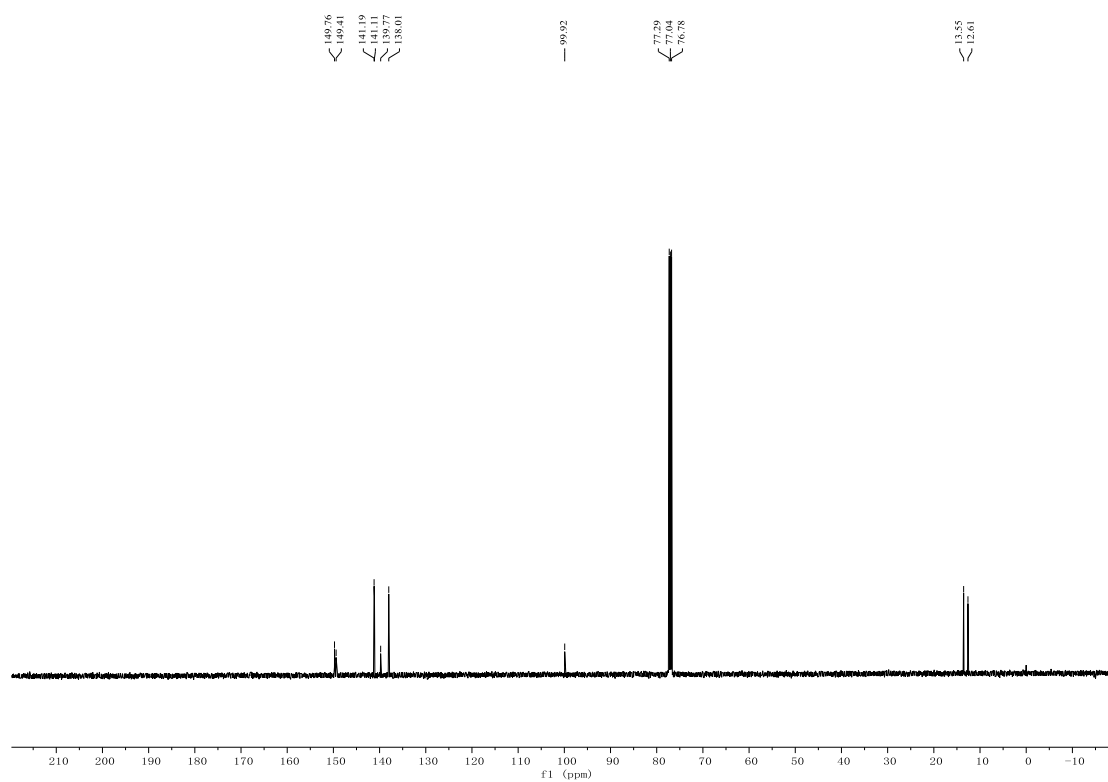

$^{13}\text{C}$  NMR of compound **4raa**

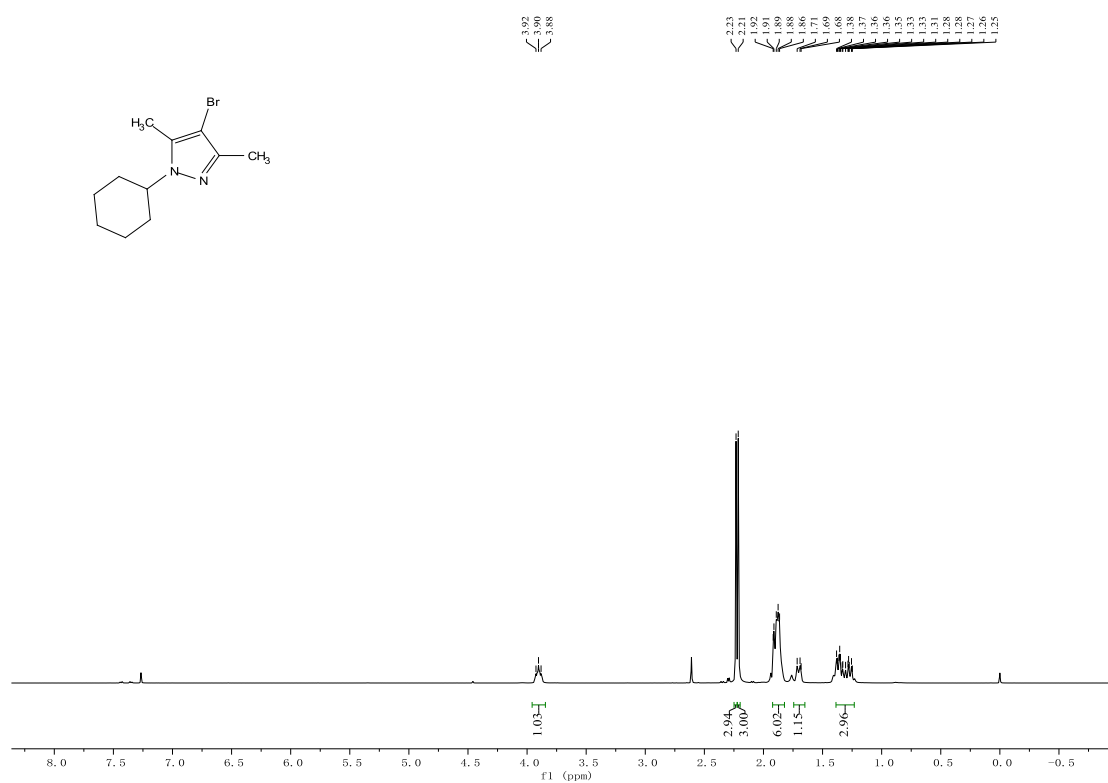

$^1\text{H}$  NMR of compound **4saa**

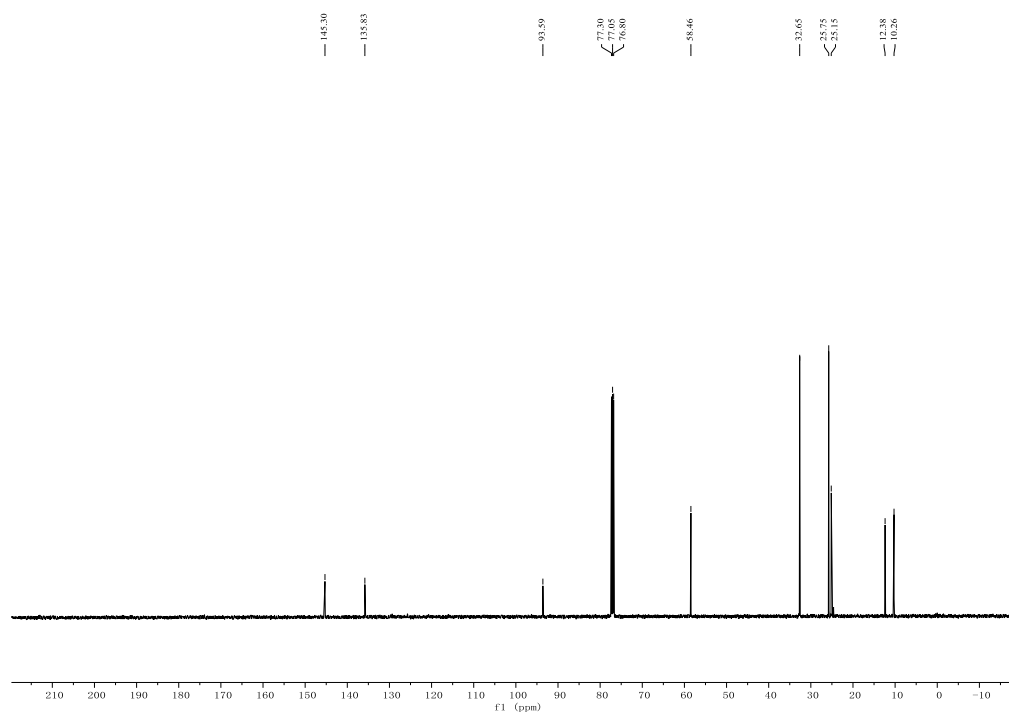

<sup>13</sup>C NMR of compound 4saa

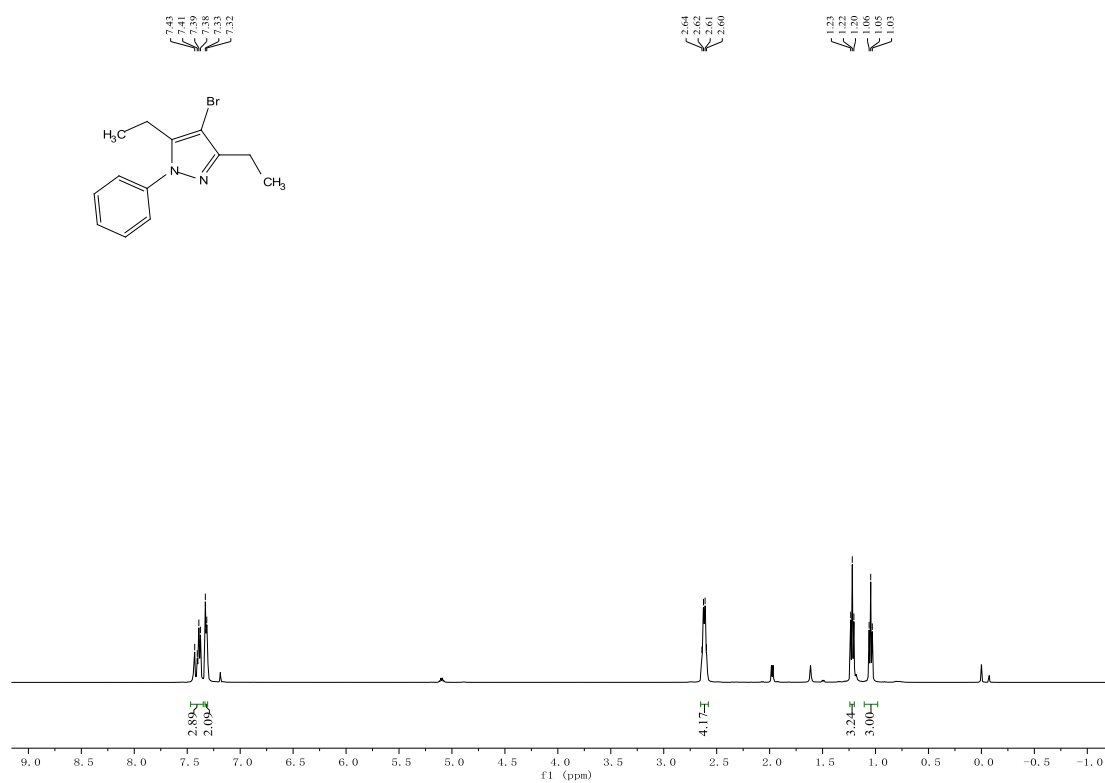

<sup>1</sup>H NMR of compound 4aba

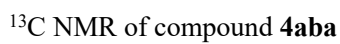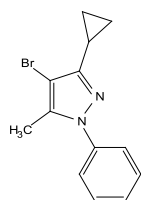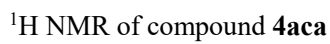

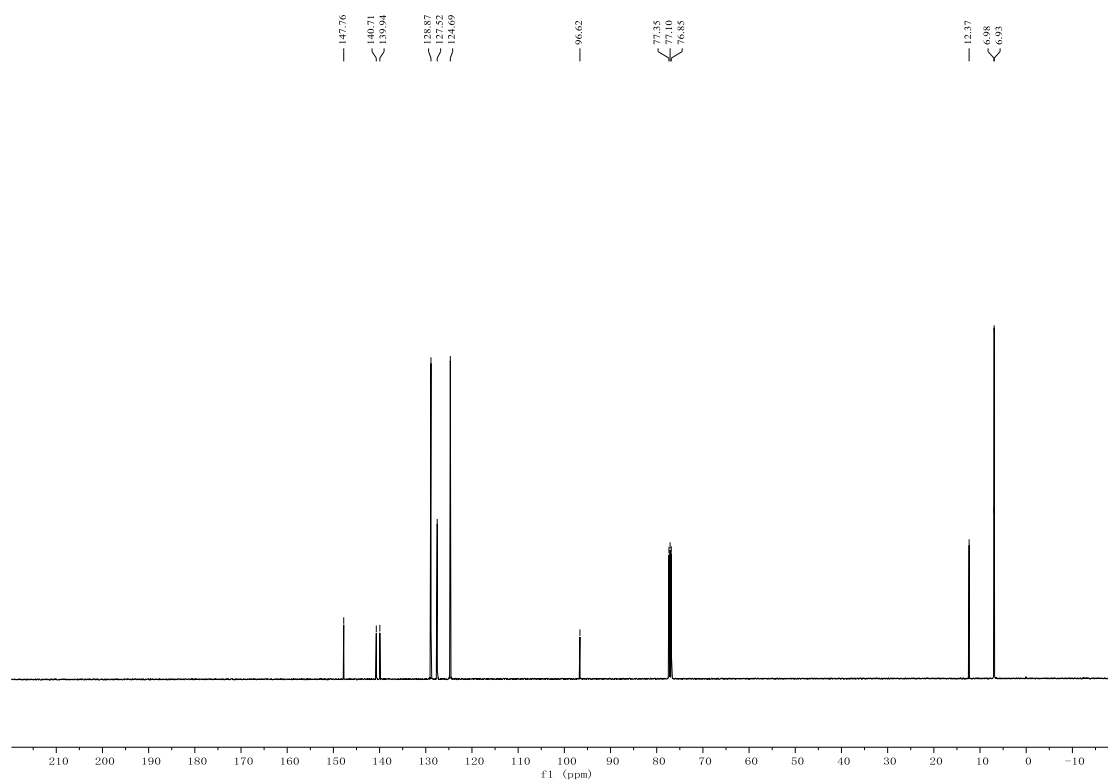

$^{13}\text{C}$  NMR of compound **4aca**

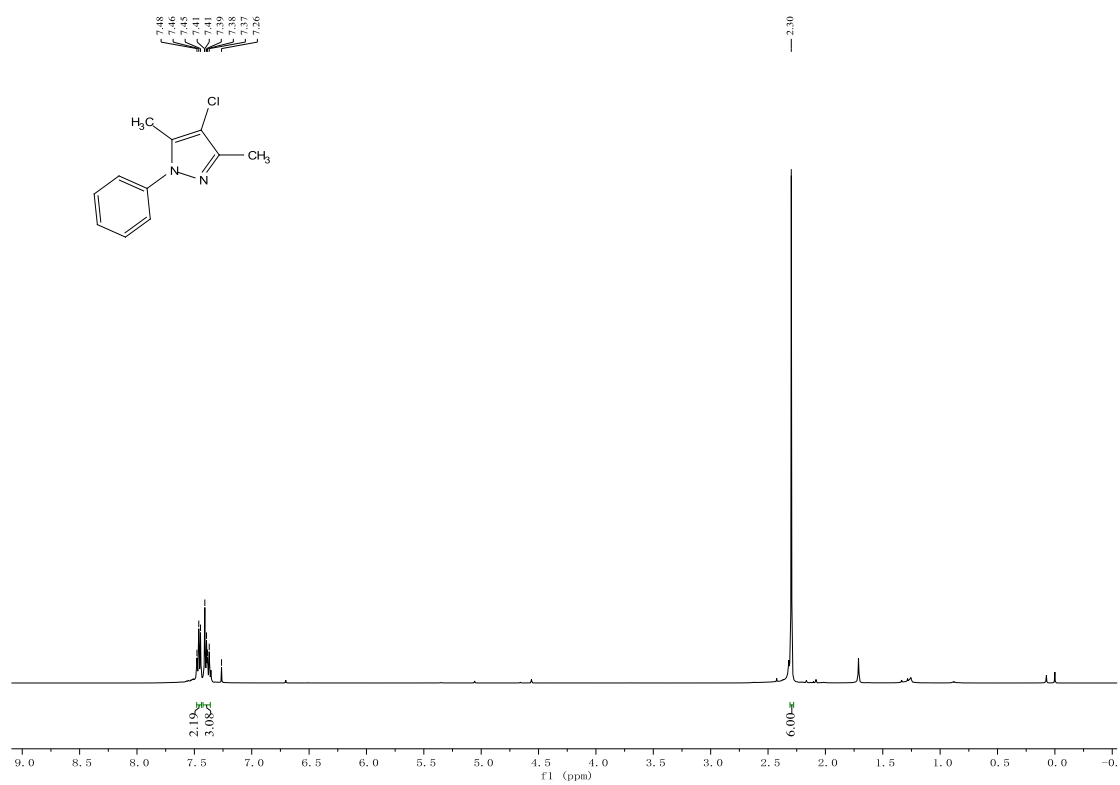

$^1\text{H}$  NMR of compound **4aab**

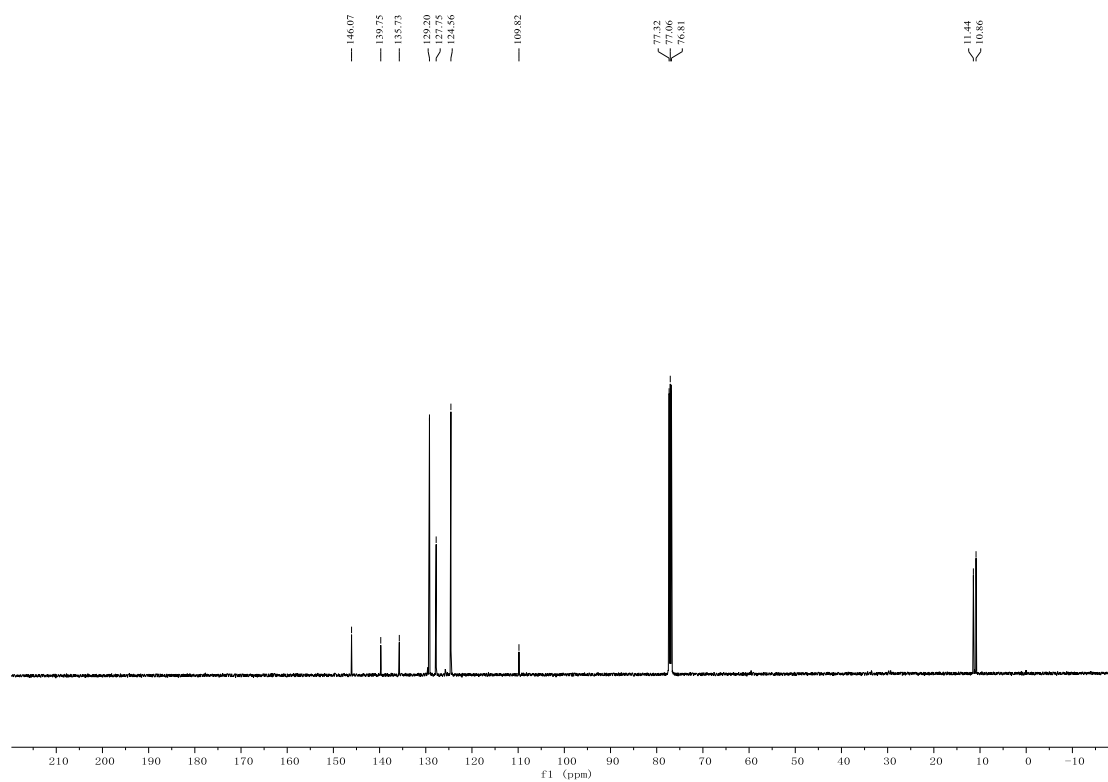

<sup>13</sup>C NMR of compound 4aab

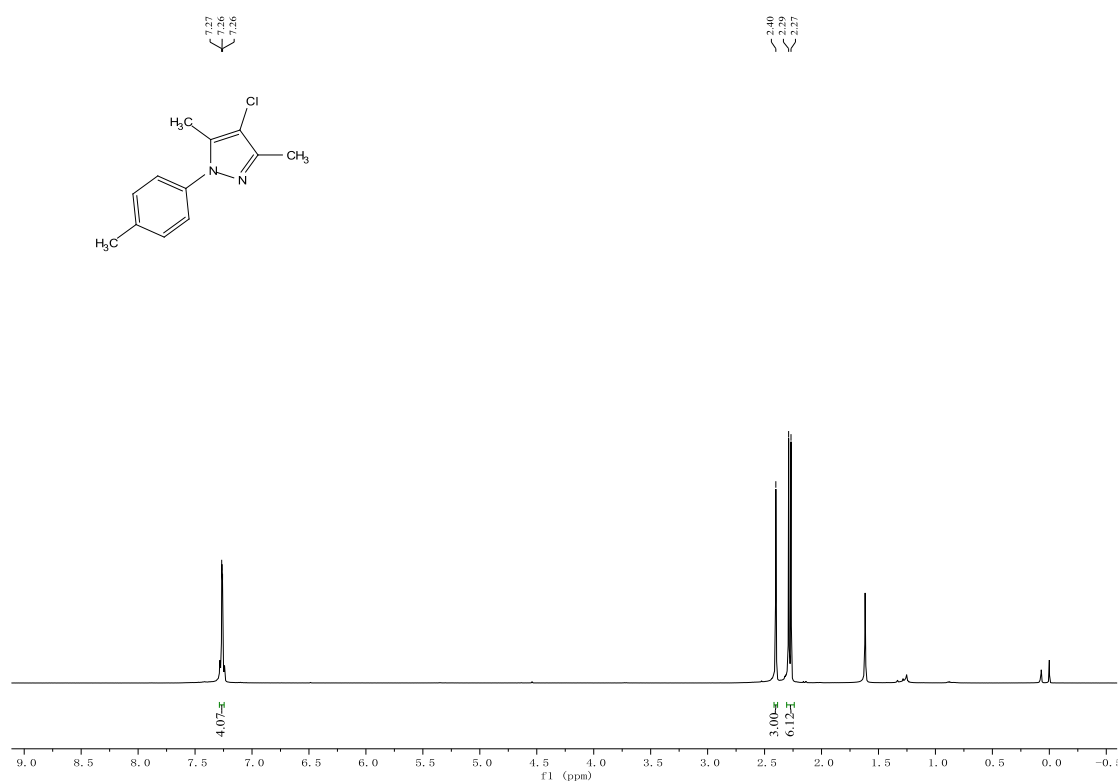

<sup>1</sup>H NMR of compound 4bab

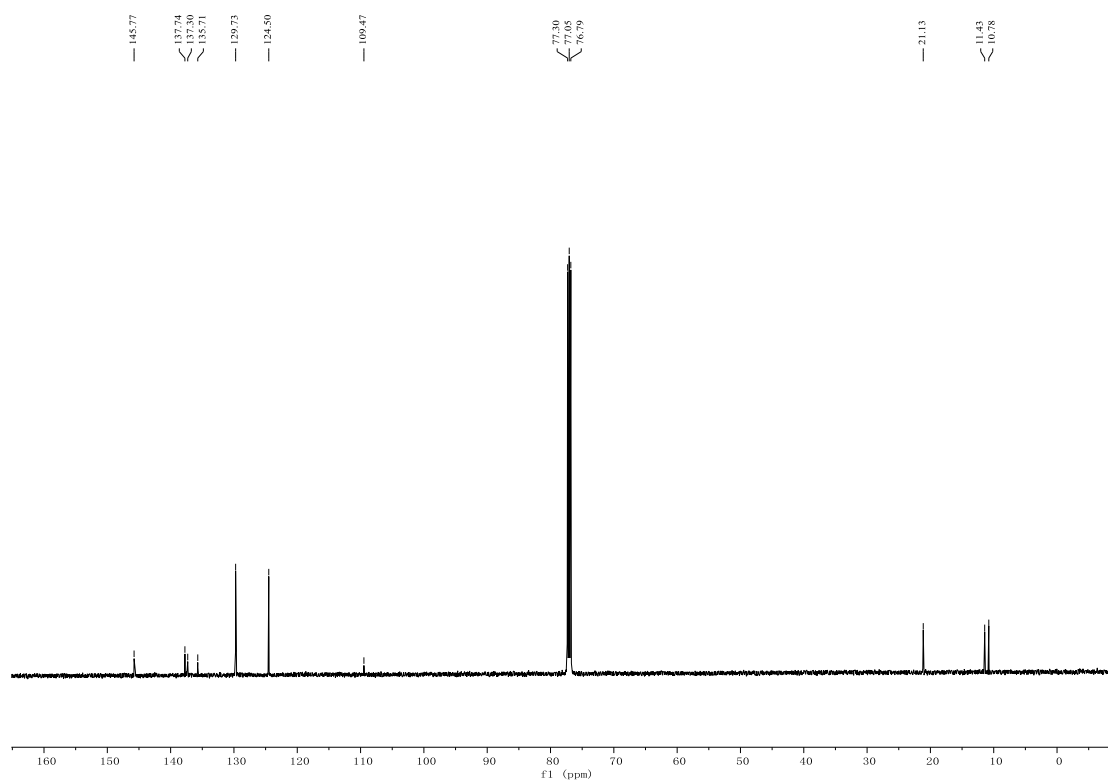

<sup>13</sup>C NMR of compound **4bab**

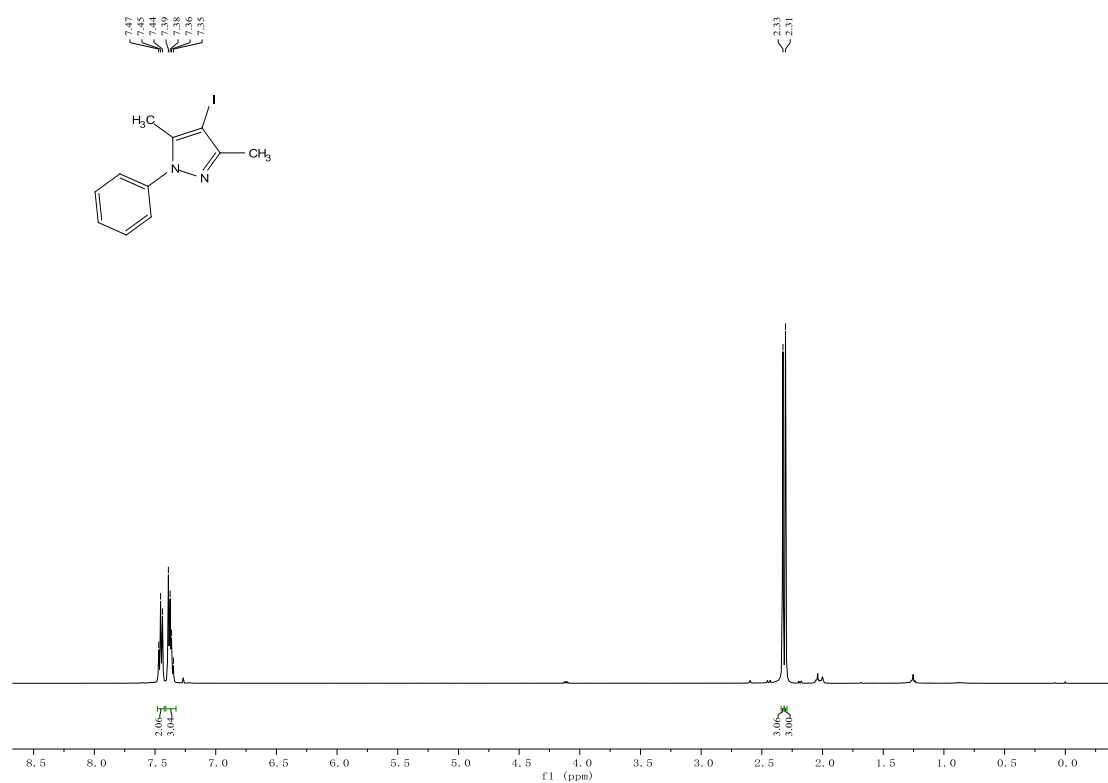

<sup>1</sup>H NMR of compound **4aac**

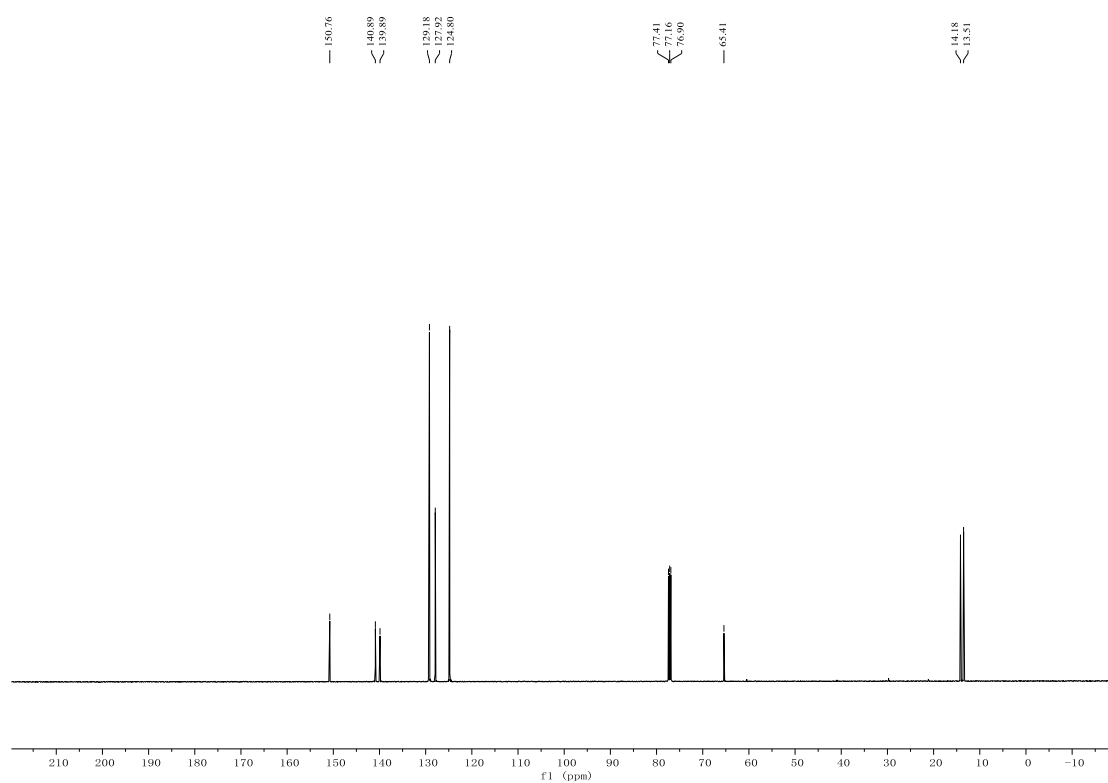

<sup>13</sup>C NMR of compound 4aac

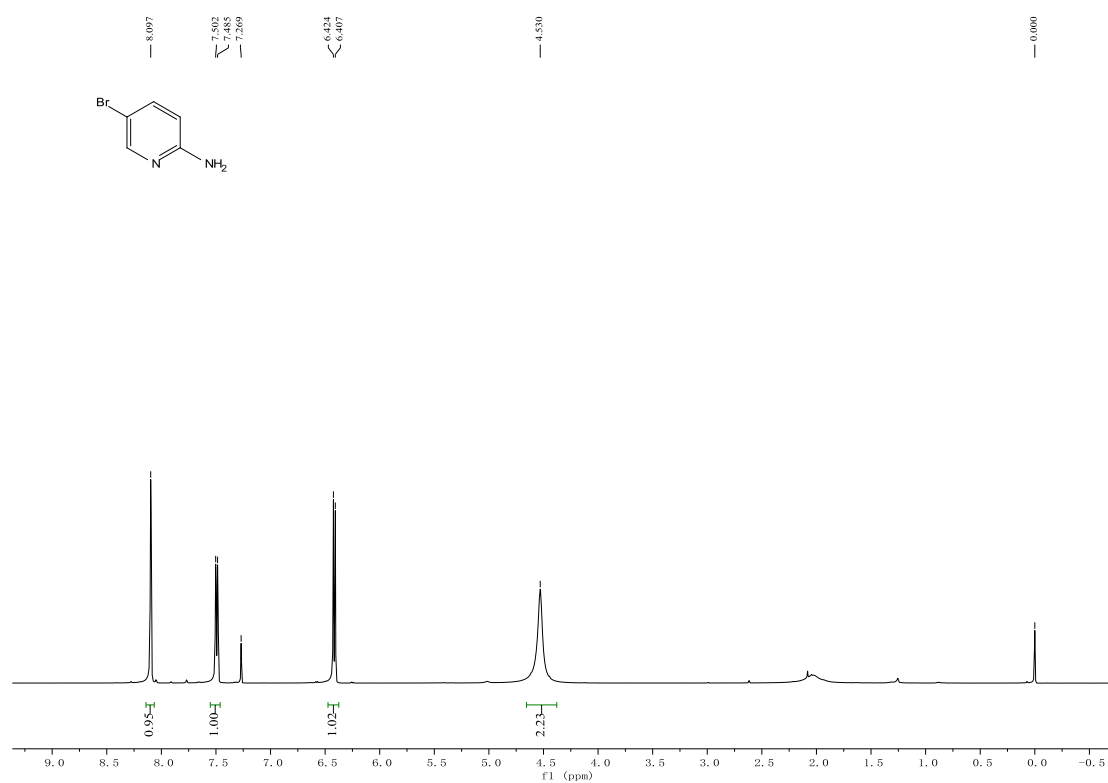

<sup>1</sup>H NMR of compound 5aa



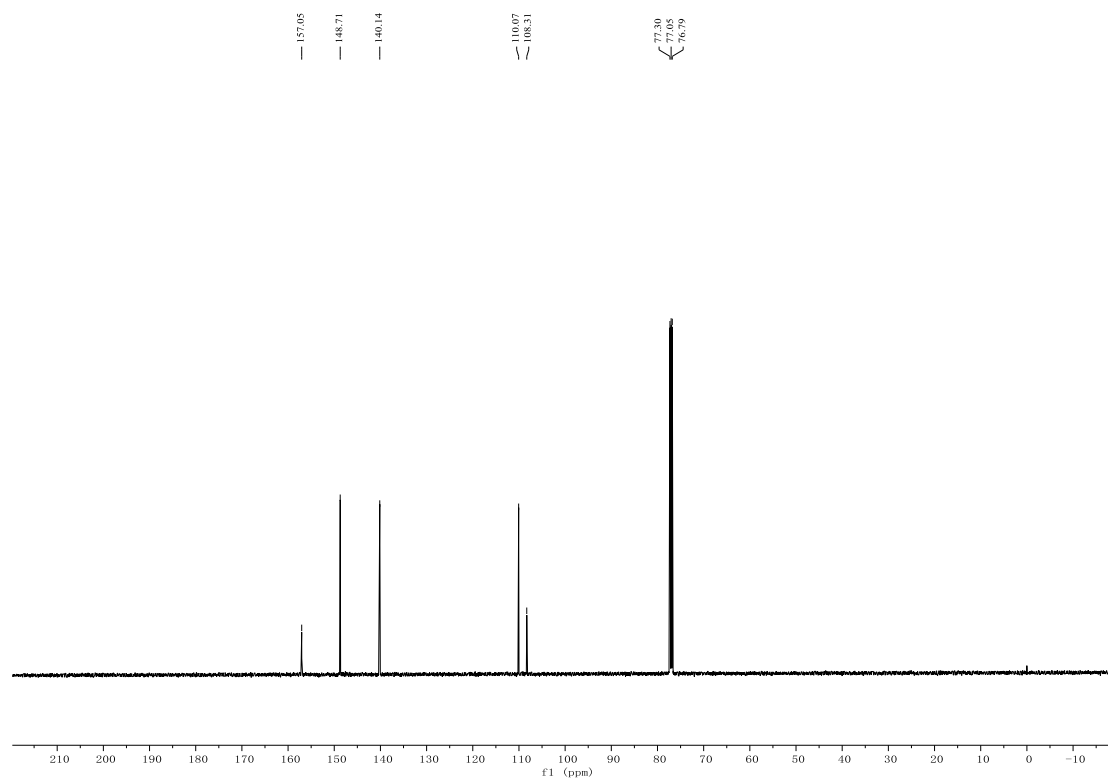

$^{13}\text{C}$  NMR of compound **5aa**

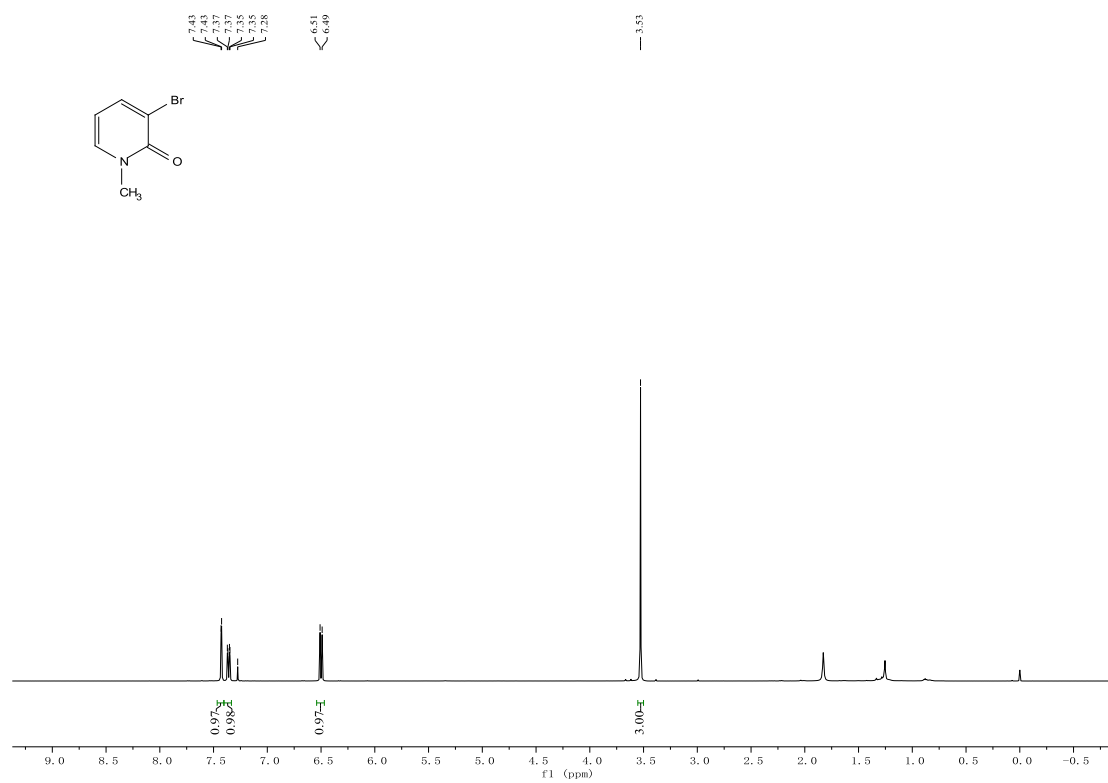

$^1\text{H}$  NMR of compound **5ba**

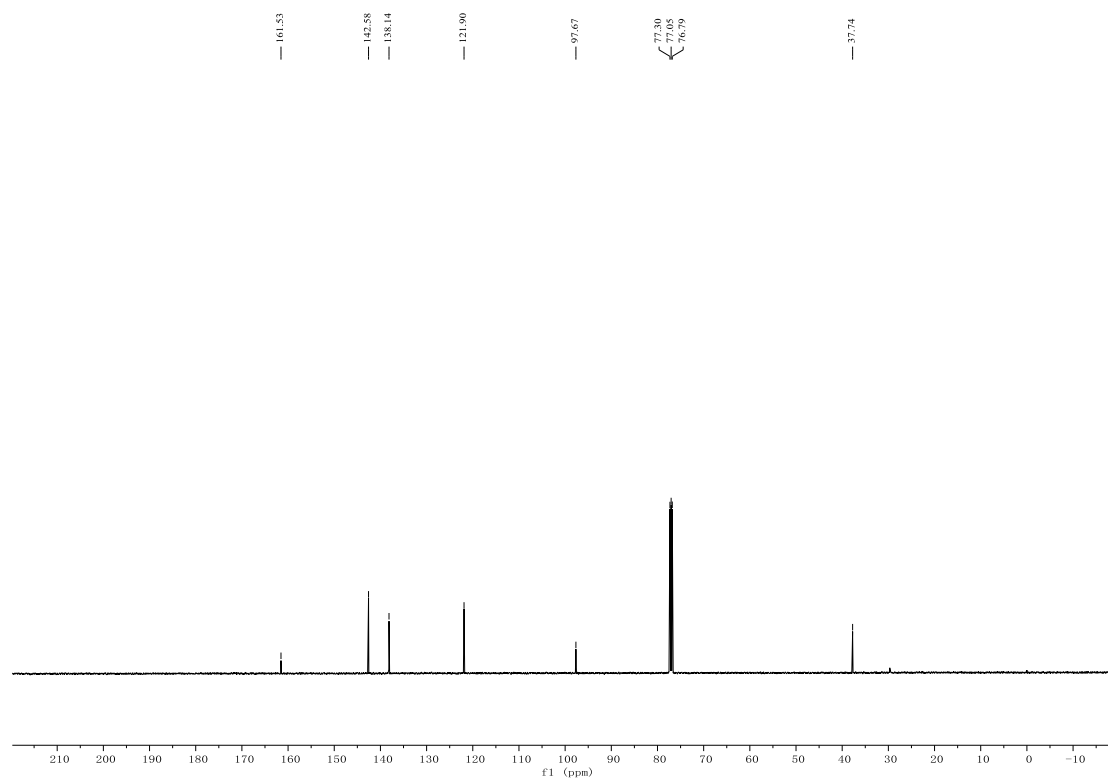

<sup>13</sup>C NMR of compound **5ba**

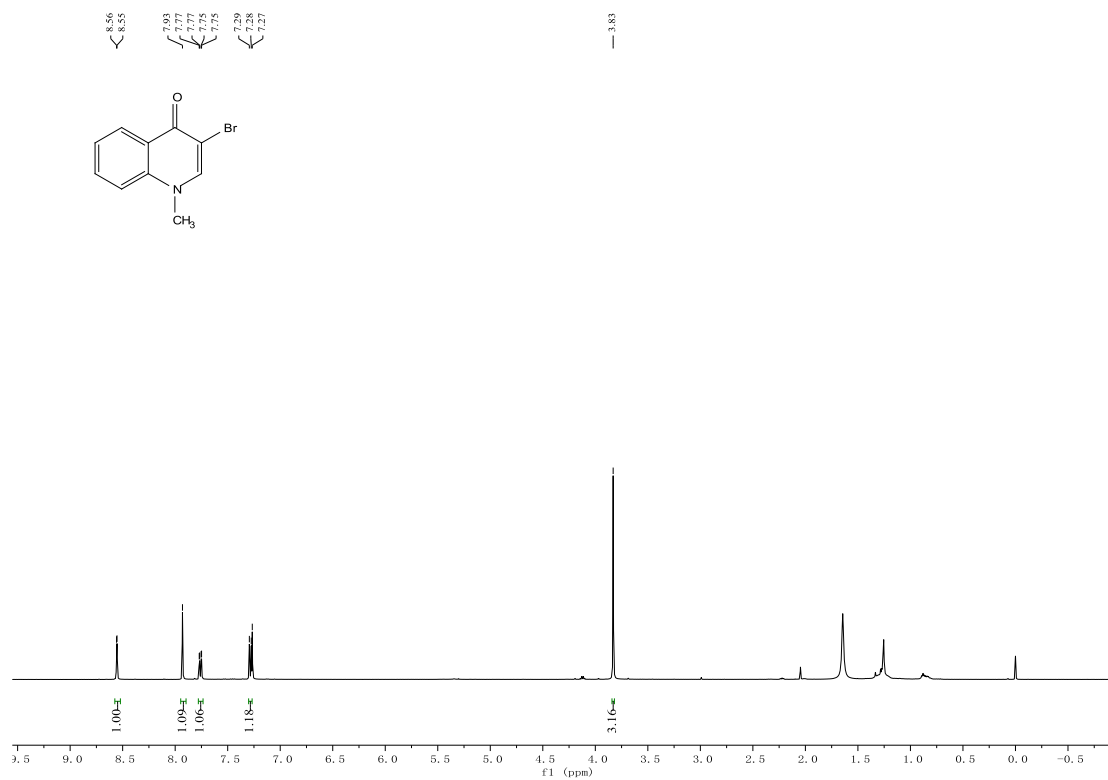

<sup>1</sup>H NMR of compound **5ca**

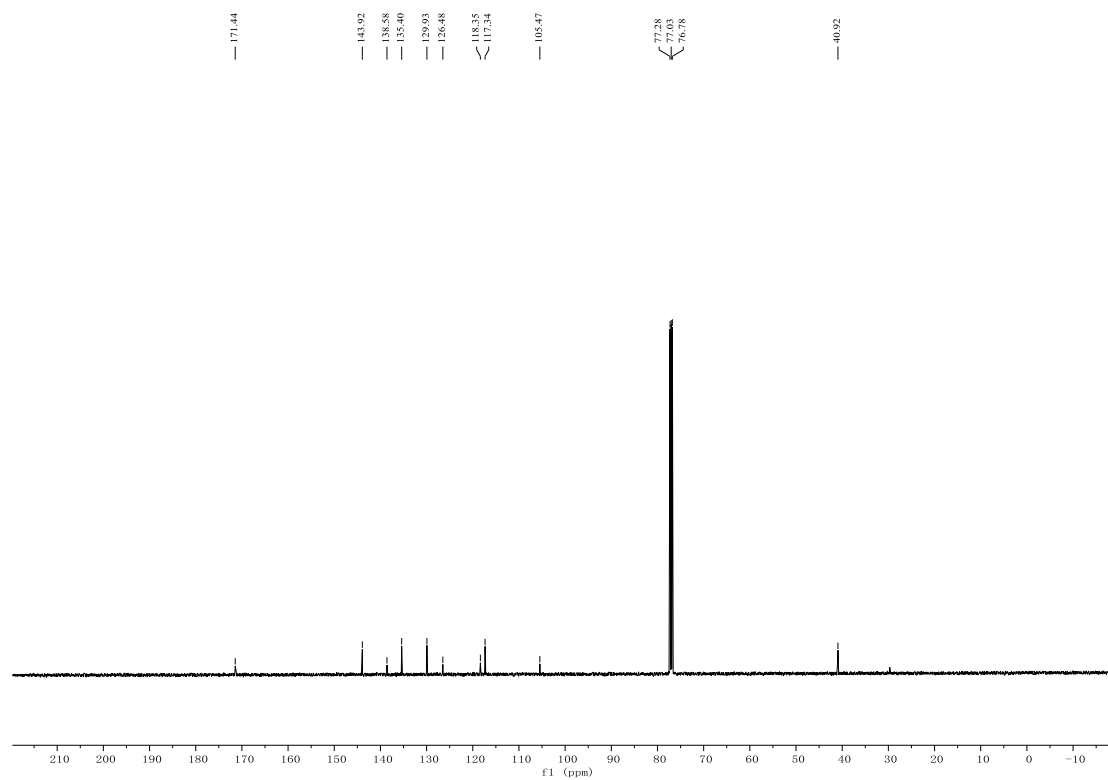

<sup>13</sup>C NMR of compound **5ca**

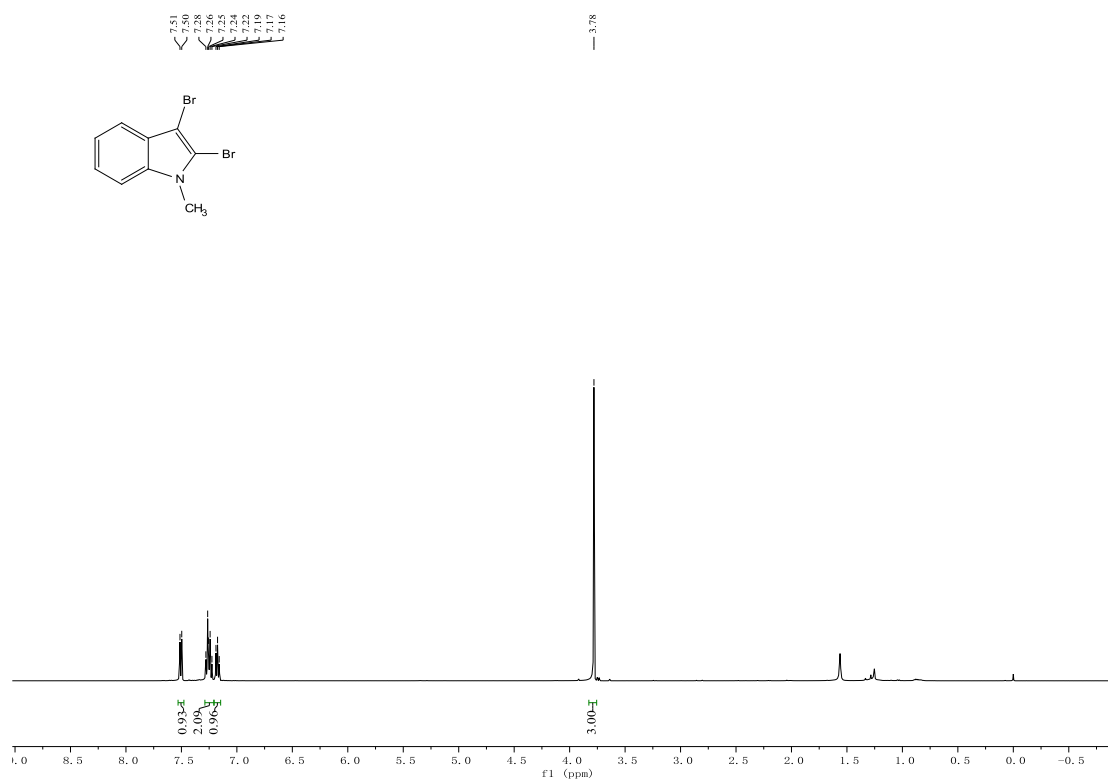

<sup>1</sup>H NMR of compound **5da**

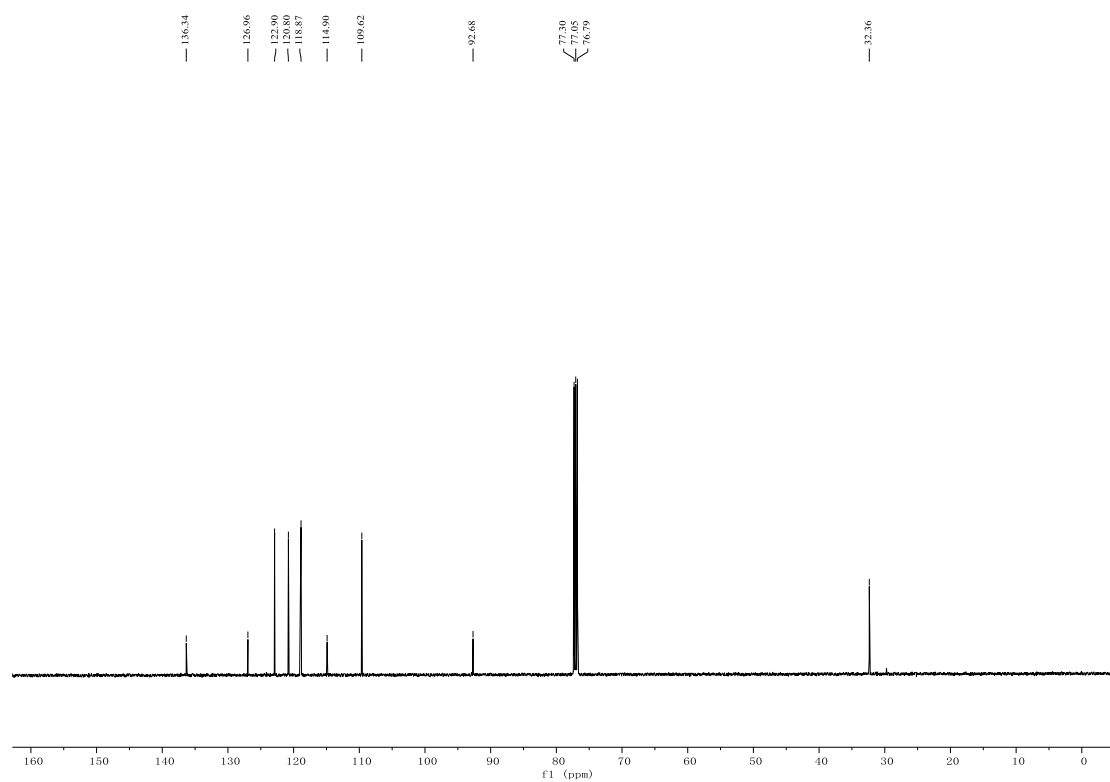

<sup>13</sup>C NMR of compound **5da**
